# Supplementary material
Source: HighWire-hosted journal article supplement (https://jitc.bmj.com/content/10/9/e004389)
Supplement: inline-supplementary-material-3 [file inline-supplementary-material-3.xlsx]

## Sheet: Sheet1
Table S1. All exonic variants of Hepa1-6 cells and C57BL/6 mouse tail
Chromosome	Position	reference	mutation	type	Depth	Freqency
chr1	100050696	G	T	nonsynonymous SNV	84	1
chr1	100050784	T	C	nonsynonymous SNV	58	1
chr1	100141408	G	T	nonsynonymous SNV	75	1
chr1	100160052	A	G	nonsynonymous SNV	88	1
chr1	100274417	G	A	nonsynonymous SNV	39	1
chr1	100274554	C	G	nonsynonymous SNV	36	1
chr1	10033314	T	G	nonsynonymous SNV	115	0.234783
chr1	10035045	C	T	nonsynonymous SNV	130	0.361538
chr1	10035048	C	T	nonsynonymous SNV	129	0.356589
chr1	10037784	T	G	nonsynonymous SNV	93	0.397849
chr1	100379180	T	C	nonsynonymous SNV	92	1
chr1	100478528	A	G	nonsynonymous SNV	63	1
chr1	105656775	C	A	nonsynonymous SNV	68	1
chr1	105664352	C	T	nonsynonymous SNV	24	1
chr1	106712771	G	A	nonsynonymous SNV	54	0.574074
chr1	107047565	T	G	nonsynonymous SNV	158	1
chr1	107078537	T	A	nonsynonymous SNV	110	1
chr1	107154379	C	G	nonsynonymous SNV	128	1
chr1	107155886	T	C	nonsynonymous SNV	177	1
chr1	107159041	C	T	nonsynonymous SNV	85	1
chr1	107272789	G	A	nonsynonymous SNV	124	1
chr1	107273171	A	G	nonsynonymous SNV	135	0.992593
chr1	107274993	T	C	nonsynonymous SNV	119	0.983193
chr1	110065735	C	G	nonsynonymous SNV	63	1
chr1	110889835	A	G	nonsynonymous SNV	86	0.27907
chr1	110893384	C	A	nonsynonymous SNV	40	1
chr1	110908109	A	C	nonsynonymous SNV	56	0.5
chr1	11170680	A	G	nonsynonymous SNV	70	1
chr1	111859457	T	C	nonsynonymous SNV	99	1
chr1	111859994	G	C	nonsynonymous SNV	113	1
chr1	111862229	A	G	nonsynonymous SNV	103	0.223301
chr1	11265732	C	T	nonsynonymous SNV	113	1
chr1	118855467	A	G	nonsynonymous SNV	23	0.217391
chr1	118868087	C	T	nonsynonymous SNV	30	1
chr1	119002044	G	T	nonsynonymous SNV	28	1
chr1	119783572	T	A	nonsynonymous SNV	130	0.207692
chr1	120031656	T	C	nonsynonymous SNV	49	1
chr1	120053730	T	C	nonsynonymous SNV	72	0.222222
chr1	120227750	T	C	nonsynonymous SNV	62	1
chr1	120234378	G	A	nonsynonymous SNV	60	1
chr1	121456126	C	T	nonsynonymous SNV	50	1
chr1	121461939	T	C	nonsynonymous SNV	48	1
chr1	121554108	T	A	nonsynonymous SNV	47	0.276596
chr1	125416273	G	C	nonsynonymous SNV	58	0.258621
chr1	125677497	T	G	nonsynonymous SNV	80	0.2125
chr1	126027270	T	C	nonsynonymous SNV	84	0.285714
chr1	128588979	T	C	nonsynonymous SNV	41	0.560976
chr1	129595853	C	T	nonsynonymous SNV	36	0.555556
chr1	129760275	A	G	nonsynonymous SNV	29	0.37931
chr1	130165063	A	C	nonsynonymous SNV	101	0.217822
chr1	131129233	A	C	nonsynonymous SNV	81	0.209877
chr1	13122474	C	T	nonsynonymous SNV	50	1
chr1	13125649	C	T	nonsynonymous SNV	44	1
chr1	131662695	T	G	nonsynonymous SNV	110	0.290909
chr1	131977075	A	C	nonsynonymous SNV	67	0.41791
chr1	132302663	T	G	nonsynonymous SNV	70	0.257143
chr1	132449387	T	A	nonsynonymous SNV	81	0.259259
chr1	132455335	C	G	nonsynonymous SNV	43	0.255814
chr1	133098709	G	C	nonsynonymous SNV	86	0.290698
chr1	133719362	C	G	nonsynonymous SNV	72	0.402778
chr1	134040546	A	C	nonsynonymous SNV	138	0.492754
chr1	134203046	G	A	nonsynonymous SNV	38	0.263158
chr1	134955502	G	C	nonsynonymous SNV	93	0.526882
chr1	135137390	T	C	nonsynonymous SNV	51	0.27451
chr1	135877799	T	G	nonsynonymous SNV	40	0.225
chr1	136260054	G	C	nonsynonymous SNV	30	0.433333
chr1	136424807	A	C	nonsynonymous SNV	127	0.228346
chr1	136845582	G	T	nonsynonymous SNV	82	0.268293
chr1	13700937	G	A	nonsynonymous SNV	117	1
chr1	139143957	A	C	nonsynonymous SNV	52	0.211538
chr1	139248503	G	T	nonsynonymous SNV	76	0.315789
chr1	139511004	G	C	nonsynonymous SNV	27	0.481481
chr1	140100845	A	C	nonsynonymous SNV	105	0.238095
chr1	150414421	A	C	nonsynonymous SNV	72	0.361111
chr1	150563586	T	C	nonsynonymous SNV	67	0.283582
chr1	150604860	G	C	nonsynonymous SNV	43	0.302326
chr1	150732831	T	G	nonsynonymous SNV	80	0.225
chr1	150743796	T	C	nonsynonymous SNV	62	0.370968
chr1	150765464	C	T	nonsynonymous SNV	83	0.385542
chr1	151457692	T	A	nonsynonymous SNV	82	0.5
chr1	151980504	T	G	nonsynonymous SNV	140	0.264286
chr1	153469632	C	T	nonsynonymous SNV	73	0.534247
chr1	153471753	G	C	nonsynonymous SNV	106	0.216981
chr1	153690972	G	A	nonsynonymous SNV	83	0.518072
chr1	153760863	A	C	nonsynonymous SNV	43	0.418605
chr1	155702296	T	G	nonsynonymous SNV	48	0.25
chr1	155779448	A	C	nonsynonymous SNV	53	1
chr1	155862369	G	A	nonsynonymous SNV	105	1
chr1	155862882	C	T	nonsynonymous SNV	69	1
chr1	155863282	C	G	nonsynonymous SNV	82	1
chr1	155915575	A	G	nonsynonymous SNV	32	0.28125
chr1	155926508	C	T	nonsynonymous SNV	48	1
chr1	155928211	C	T	nonsynonymous SNV	81	1
chr1	155958681	G	A	nonsynonymous SNV	35	1
chr1	156022318	C	T	nonsynonymous SNV	89	1
chr1	156061657	A	G	nonsynonymous SNV	65	1
chr1	156061765	A	G	nonsynonymous SNV	61	1
chr1	156061876	G	C	nonsynonymous SNV	32	1
chr1	156061909	G	T	nonsynonymous SNV	28	1
chr1	156065045	G	A	nonsynonymous SNV	62	1
chr1	156078970	T	C	nonsynonymous SNV	75	1
chr1	156262881	G	C	nonsynonymous SNV	83	1
chr1	156263413	G	A	nonsynonymous SNV	71	1
chr1	156267355	C	T	nonsynonymous SNV	53	1
chr1	156270646	C	T	nonsynonymous SNV	64	1
chr1	156285523	T	C	nonsynonymous SNV	77	1
chr1	156301806	T	C	nonsynonymous SNV	83	1
chr1	156318723	C	T	nonsynonymous SNV	80	1
chr1	156326100	C	T	nonsynonymous SNV	76	1
chr1	156397526	C	T	nonsynonymous SNV	78	1
chr1	156441366	G	A	nonsynonymous SNV	65	1
chr1	156442409	T	C	nonsynonymous SNV	38	1
chr1	156625337	A	C	nonsynonymous SNV	32	0.25
chr1	156642255	A	G	nonsynonymous SNV	53	1
chr1	156655866	A	G	nonsynonymous SNV	47	1
chr1	156669484	A	C	nonsynonymous SNV	72	1
chr1	156669619	G	A	nonsynonymous SNV	44	1
chr1	156673586	C	T	nonsynonymous SNV	41	1
chr1	156674181	T	G	nonsynonymous SNV	30	1
chr1	156832745	T	C	nonsynonymous SNV	99	1
chr1	156860423	G	A	nonsynonymous SNV	51	0.45098
chr1	157100165	G	A	nonsynonymous SNV	86	1
chr1	157100202	C	T	nonsynonymous SNV	99	0.989899
chr1	15710459	T	A	nonsynonymous SNV	80	1
chr1	15711098	G	C	nonsynonymous SNV	71	0.253521
chr1	157158784	C	G	nonsynonymous SNV	61	0.245902
chr1	157464427	C	T	nonsynonymous SNV	33	1
chr1	157529318	T	C	nonsynonymous SNV	84	1
chr1	157535456	C	T	nonsynonymous SNV	59	0.915254
chr1	157559468	C	T	nonsynonymous SNV	32	1
chr1	157565439	T	C	nonsynonymous SNV	65	1
chr1	15819010	G	A	nonsynonymous SNV	75	1
chr1	15819055	G	A	nonsynonymous SNV	73	1
chr1	15819070	C	G	nonsynonymous SNV	72	1
chr1	15819757	A	G	nonsynonymous SNV	83	1
chr1	158246692	C	T	nonsynonymous SNV	73	1
chr1	158266584	T	G	nonsynonymous SNV	40	1
chr1	15833438	C	A	nonsynonymous SNV	109	1
chr1	15833442	C	T	nonsynonymous SNV	108	1
chr1	158509911	A	C	nonsynonymous SNV	84	1
chr1	158580278	C	G	nonsynonymous SNV	53	0.283019
chr1	158597288	G	C	nonsynonymous SNV	23	1
chr1	158750571	G	A	nonsynonymous SNV	26	1
chr1	158765041	C	T	nonsynonymous SNV	75	1
chr1	158787723	G	A	nonsynonymous SNV	74	1
chr1	158814493	T	G	nonsynonymous SNV	45	1
chr1	158814833	T	C	nonsynonymous SNV	55	1
chr1	158832839	T	C	nonsynonymous SNV	42	1
chr1	158834769	G	A	nonsynonymous SNV	57	1
chr1	158834943	C	T	nonsynonymous SNV	59	1
chr1	158845048	G	C	nonsynonymous SNV	31	1
chr1	158845082	A	C	nonsynonymous SNV	33	1
chr1	158845116	G	T	nonsynonymous SNV	35	1
chr1	158956583	C	T	nonsynonymous SNV	37	1
chr1	158956669	G	T	nonsynonymous SNV	39	1
chr1	158956870	T	C	nonsynonymous SNV	38	1
chr1	159850197	G	C	nonsynonymous SNV	70	1
chr1	159858348	T	C	nonsynonymous SNV	76	1
chr1	159886989	A	G	nonsynonymous SNV	63	1
chr1	159919046	C	T	nonsynonymous SNV	53	1
chr1	160105424	C	T	nonsynonymous SNV	67	1
chr1	160114556	G	A	nonsynonymous SNV	115	1
chr1	160147563	T	C	nonsynonymous SNV	61	1
chr1	160739013	C	T	nonsynonymous SNV	55	1
chr1	160739066	T	G	nonsynonymous SNV	44	1
chr1	160997710	C	A	nonsynonymous SNV	66	1
chr1	161046833	T	A	nonsynonymous SNV	54	1
chr1	161051348	A	G	nonsynonymous SNV	109	1
chr1	161070092	G	T	nonsynonymous SNV	28	1
chr1	161083424	T	G	nonsynonymous SNV	47	1
chr1	161244224	G	T	nonsynonymous SNV	54	1
chr1	161503752	C	A	nonsynonymous SNV	76	1
chr1	161781763	T	C	nonsynonymous SNV	122	1
chr1	161781866	T	C	nonsynonymous SNV	101	1
chr1	161834798	C	T	nonsynonymous SNV	72	1
chr1	161857375	C	G	nonsynonymous SNV	39	1
chr1	162231738	G	C	nonsynonymous SNV	91	0.241758
chr1	162545899	C	T	nonsynonymous SNV	35	1
chr1	162577914	T	C	nonsynonymous SNV	97	0.56701
chr1	162704573	T	A	nonsynonymous SNV	112	1
chr1	162706508	T	C	nonsynonymous SNV	93	1
chr1	162718880	G	C	nonsynonymous SNV	50	1
chr1	162795070	G	A	nonsynonymous SNV	52	1
chr1	162798816	G	C	nonsynonymous SNV	64	0.234375
chr1	162799048	T	C	nonsynonymous SNV	66	1
chr1	162805167	T	C	nonsynonymous SNV	62	1
chr1	162808440	C	T	nonsynonymous SNV	50	1
chr1	164132248	T	C	nonsynonymous SNV	50	0.24
chr1	164347832	T	G	nonsynonymous SNV	99	0.242424
chr1	165546560	A	C	nonsynonymous SNV	60	0.216667
chr1	171051722	A	C	nonsynonymous SNV	24	1
chr1	171057793	A	C	nonsynonymous SNV	60	1
chr1	171057815	A	C	nonsynonymous SNV	63	1
chr1	171057820	A	C	nonsynonymous SNV	65	1
chr1	171257868	G	T	nonsynonymous SNV	88	0.386364
chr1	171341019	G	A	nonsynonymous SNV	110	0.454545
chr1	171344388	G	C	nonsynonymous SNV	92	0.26087
chr1	17145545	A	G	nonsynonymous SNV	24	1
chr1	172070015	C	A	nonsynonymous SNV	32	0.4375
chr1	172235029	G	C	nonsynonymous SNV	53	0.264151
chr1	172317691	C	G	nonsynonymous SNV	30	0.333333
chr1	172369498	A	C	nonsynonymous SNV	52	0.365385
chr1	173216153	G	T	nonsynonymous SNV	147	0.707483
chr1	173862792	T	G	nonsynonymous SNV	114	0.219298
chr1	174192945	T	A	nonsynonymous SNV	84	0.25
chr1	174198575	A	G	nonsynonymous SNV	24	0.541667
chr1	174430478	T	C	nonsynonymous SNV	65	0.553846
chr1	17602652	C	T	nonsynonymous SNV	94	1
chr1	178172267	C	A	nonsynonymous SNV	34	1
chr1	178331369	G	C	nonsynonymous SNV	125	0.232
chr1	178337330	G	C	nonsynonymous SNV	29	0.482759
chr1	178915381	G	A	nonsynonymous SNV	27	1
chr1	178957477	T	G	nonsynonymous SNV	39	0.307692
chr1	179546096	G	C	nonsynonymous SNV	39	1
chr1	179546098	T	G	nonsynonymous SNV	39	1
chr1	179579744	A	G	nonsynonymous SNV	59	1
chr1	179610043	G	A	nonsynonymous SNV	22	1
chr1	179610140	G	A	nonsynonymous SNV	47	0.93617
chr1	179610254	C	T	nonsynonymous SNV	40	1
chr1	179610260	G	A	nonsynonymous SNV	37	1
chr1	179610620	G	A	nonsynonymous SNV	62	1
chr1	179748643	A	T	nonsynonymous SNV	114	1
chr1	179752502	G	A	nonsynonymous SNV	107	1
chr1	179752948	A	C	nonsynonymous SNV	165	1
chr1	179753456	T	C	nonsynonymous SNV	123	1
chr1	179753463	T	G	nonsynonymous SNV	123	1
chr1	179753483	T	C	nonsynonymous SNV	131	1
chr1	179753544	A	G	nonsynonymous SNV	135	1
chr1	179753766	A	T	nonsynonymous SNV	109	1
chr1	179760283	G	C	nonsynonymous SNV	89	1
chr1	179762572	C	T	nonsynonymous SNV	63	1
chr1	179763595	A	G	nonsynonymous SNV	74	1
chr1	180178986	G	A	nonsynonymous SNV	74	1
chr1	180332587	A	G	nonsynonymous SNV	21	1
chr1	180333341	A	G	nonsynonymous SNV	41	1
chr1	180333680	G	A	nonsynonymous SNV	46	1
chr1	180855863	A	G	nonsynonymous SNV	62	1
chr1	180862551	T	C	nonsynonymous SNV	46	1
chr1	180862558	C	T	nonsynonymous SNV	51	1
chr1	180862575	T	C	nonsynonymous SNV	54	1
chr1	180862620	A	T	nonsynonymous SNV	53	1
chr1	180862714	A	C	nonsynonymous SNV	45	1
chr1	180862741	C	T	nonsynonymous SNV	36	1
chr1	180862774	T	C	nonsynonymous SNV	30	1
chr1	180866166	T	C	nonsynonymous SNV	71	1
chr1	180897476	T	C	nonsynonymous SNV	72	1
chr1	180906947	G	A	nonsynonymous SNV	51	0.196078
chr1	180935113	C	T	nonsynonymous SNV	56	1
chr1	180935284	A	G	nonsynonymous SNV	41	1
chr1	180937154	T	G	nonsynonymous SNV	49	1
chr1	180937798	G	C	nonsynonymous SNV	61	0.491803
chr1	180956009	C	G	nonsynonymous SNV	90	0.222222
chr1	180965797	T	C	nonsynonymous SNV	73	1
chr1	181001924	A	T	nonsynonymous SNV	62	1
chr1	181123924	C	T	nonsynonymous SNV	30	1
chr1	181409714	G	A	nonsynonymous SNV	50	1
chr1	181510502	C	T	nonsynonymous SNV	67	0.298507
chr1	181821532	C	G	nonsynonymous SNV	49	0.510204
chr1	182442801	G	A	nonsynonymous SNV	32	1
chr1	182448926	C	T	nonsynonymous SNV	54	1
chr1	182478607	C	T	nonsynonymous SNV	54	1
chr1	185346691	A	C	nonsynonymous SNV	89	0.280899
chr1	188444638	T	G	nonsynonymous SNV	58	0.310345
chr1	189658828	A	C	nonsynonymous SNV	87	0.298851
chr1	20058321	C	T	nonsynonymous SNV	31	1
chr1	20058333	T	C	nonsynonymous SNV	34	1
chr1	20058600	T	C	nonsynonymous SNV	30	1
chr1	20058611	T	C	nonsynonymous SNV	27	1
chr1	20200552	C	T	nonsynonymous SNV	46	1
chr1	20209281	C	T	nonsynonymous SNV	46	1
chr1	20209301	G	A	nonsynonymous SNV	48	1
chr1	20350460	C	T	nonsynonymous SNV	43	1
chr1	20358889	G	T	nonsynonymous SNV	69	1
chr1	20509040	C	T	nonsynonymous SNV	42	1
chr1	20520157	G	C	nonsynonymous SNV	58	1
chr1	20522979	T	C	nonsynonymous SNV	75	1
chr1	20523048	A	T	nonsynonymous SNV	70	1
chr1	20523125	G	A	nonsynonymous SNV	53	1
chr1	20523261	A	G	nonsynonymous SNV	58	0.586207
chr1	20523440	A	T	nonsynonymous SNV	55	1
chr1	20523851	G	A	nonsynonymous SNV	75	1
chr1	20524097	A	G	nonsynonymous SNV	66	1
chr1	20524250	C	T	nonsynonymous SNV	34	1
chr1	20534578	A	G	nonsynonymous SNV	68	1
chr1	20537401	T	A	nonsynonymous SNV	56	1
chr1	20547347	G	T	nonsynonymous SNV	51	1
chr1	20553472	G	T	nonsynonymous SNV	96	1
chr1	20558674	G	A	nonsynonymous SNV	66	1
chr1	20558708	T	G	nonsynonymous SNV	60	1
chr1	20562376	A	G	nonsynonymous SNV	24	1
chr1	20562472	C	A	nonsynonymous SNV	28	1
chr1	20563652	T	C	nonsynonymous SNV	90	1
chr1	20613452	A	T	nonsynonymous SNV	110	1
chr1	20934969	A	G	nonsynonymous SNV	52	1
chr1	20935152	A	C	nonsynonymous SNV	54	1
chr1	20935638	A	T	nonsynonymous SNV	33	1
chr1	21350263	C	G	nonsynonymous SNV	144	1
chr1	23877731	A	C	nonsynonymous SNV	94	0.468085
chr1	25420647	C	T	nonsynonymous SNV	114	1
chr1	26683991	A	T	nonsynonymous SNV	89	1
chr1	26684452	C	A	nonsynonymous SNV	122	0.245902
chr1	26684465	C	A	nonsynonymous SNV	115	0.234783
chr1	26687400	A	T	nonsynonymous SNV	219	0.219178
chr1	28776317	C	T	nonsynonymous SNV	63	1
chr1	28776782	G	C	nonsynonymous SNV	96	1
chr1	28777184	A	G	nonsynonymous SNV	92	1
chr1	28777286	C	G	nonsynonymous SNV	80	1
chr1	28777292	C	T	nonsynonymous SNV	78	1
chr1	28777678	G	T	nonsynonymous SNV	73	1
chr1	28778246	C	T	nonsynonymous SNV	85	1
chr1	28778425	T	G	nonsynonymous SNV	86	0.290698
chr1	30821170	T	C	nonsynonymous SNV	93	1
chr1	30830434	C	T	nonsynonymous SNV	90	1
chr1	32545670	G	C	nonsynonymous SNV	196	1
chr1	33739273	A	G	nonsynonymous SNV	93	1
chr1	3421849	C	T	nonsynonymous SNV	45	1
chr1	37260937	A	C	nonsynonymous SNV	100	0.35
chr1	37987688	A	G	nonsynonymous SNV	113	0.265487
chr1	38996207	C	T	nonsynonymous SNV	53	1
chr1	39402752	C	G	nonsynonymous SNV	61	0.262295
chr1	40743877	G	T	nonsynonymous SNV	113	0.265487
chr1	40756316	T	G	nonsynonymous SNV	87	0.333333
chr1	40805860	A	C	nonsynonymous SNV	91	0.494505
chr1	43051839	C	T	nonsynonymous SNV	25	0.32
chr1	4345117	G	A	nonsynonymous SNV	107	0.242991
chr1	44110858	C	G	nonsynonymous SNV	48	0.229167
chr1	46299956	G	A	nonsynonymous SNV	56	0.214286
chr1	46532940	T	C	nonsynonymous SNV	170	0.505882
chr1	46626031	T	C	nonsynonymous SNV	62	0.274194
chr1	46668229	A	C	nonsynonymous SNV	115	0.243478
chr1	51181826	T	G	nonsynonymous SNV	60	1
chr1	52166216	T	C	nonsynonymous SNV	94	0.404255
chr1	52658496	G	C	nonsynonymous SNV	25	0.24
chr1	55713440	T	C	nonsynonymous SNV	69	0.26087
chr1	59203028	C	T	nonsynonymous SNV	75	0.226667
chr1	59516487	G	A	nonsynonymous SNV	34	1
chr1	59549945	A	G	nonsynonymous SNV	52	0.980769
chr1	59558092	G	A	nonsynonymous SNV	45	1
chr1	59558194	T	C	nonsynonymous SNV	91	1
chr1	59558220	C	T	nonsynonymous SNV	86	1
chr1	59607743	G	A	nonsynonymous SNV	117	1
chr1	59630103	C	T	nonsynonymous SNV	86	1
chr1	59630259	T	C	nonsynonymous SNV	55	1
chr1	59632229	A	C	nonsynonymous SNV	21	1
chr1	59634254	G	A	nonsynonymous SNV	32	1
chr1	59706714	A	G	nonsynonymous SNV	60	1
chr1	59851246	G	A	nonsynonymous SNV	63	0.825397
chr1	59867660	G	C	nonsynonymous SNV	130	1
chr1	59868385	A	G	nonsynonymous SNV	99	1
chr1	59949161	T	G	nonsynonymous SNV	98	1
chr1	60078184	T	C	nonsynonymous SNV	141	1
chr1	60108136	G	A	nonsynonymous SNV	48	1
chr1	60109377	T	A	nonsynonymous SNV	83	1
chr1	60139321	A	G	nonsynonymous SNV	88	1
chr1	60147427	G	T	nonsynonymous SNV	93	1
chr1	60147965	G	C	nonsynonymous SNV	80	1
chr1	60264290	A	G	nonsynonymous SNV	99	1
chr1	60277932	A	G	nonsynonymous SNV	66	1
chr1	60278060	T	A	nonsynonymous SNV	44	1
chr1	60319729	T	C	nonsynonymous SNV	97	1
chr1	60329343	A	T	nonsynonymous SNV	64	1
chr1	60354598	A	G	nonsynonymous SNV	73	1
chr1	60354642	C	G	nonsynonymous SNV	64	1
chr1	60376099	A	T	nonsynonymous SNV	35	1
chr1	62637853	G	A	nonsynonymous SNV	59	1
chr1	63151632	A	G	nonsynonymous SNV	55	1
chr1	63303085	G	C	nonsynonymous SNV	111	0.252252
chr1	63623085	A	G	nonsynonymous SNV	84	1
chr1	63633753	A	G	nonsynonymous SNV	82	1
chr1	63661245	T	C	nonsynonymous SNV	74	1
chr1	63664810	C	T	nonsynonymous SNV	73	1
chr1	65050868	C	T	nonsynonymous SNV	132	0.621212
chr1	65063157	T	C	nonsynonymous SNV	54	1
chr1	65071663	A	T	nonsynonymous SNV	87	0.333333
chr1	65071699	C	T	nonsynonymous SNV	84	0.25
chr1	65081929	A	G	nonsynonymous SNV	120	1
chr1	65159497	A	T	nonsynonymous SNV	104	0.211538
chr1	65165221	C	A	nonsynonymous SNV	56	1
chr1	65246347	C	T	nonsynonymous SNV	107	1
chr1	65926877	A	G	nonsynonymous SNV	83	1
chr1	65928211	G	A	nonsynonymous SNV	65	1
chr1	66399472	C	T	nonsynonymous SNV	41	1
chr1	66412466	G	A	nonsynonymous SNV	65	1
chr1	66413315	A	G	nonsynonymous SNV	98	1
chr1	66413329	T	G	nonsynonymous SNV	100	1
chr1	66413883	A	G	nonsynonymous SNV	113	1
chr1	66413943	A	G	nonsynonymous SNV	144	0.208333
chr1	66414791	A	G	nonsynonymous SNV	68	1
chr1	66414912	G	C	nonsynonymous SNV	98	1
chr1	66425398	G	A	nonsynonymous SNV	76	0.355263
chr1	66622495	C	G	nonsynonymous SNV	53	0.301887
chr1	66651527	T	C	nonsynonymous SNV	57	0.263158
chr1	66654521	C	T	nonsynonymous SNV	54	0.388889
chr1	66695563	C	G	nonsynonymous SNV	60	1
chr1	66720913	T	C	nonsynonymous SNV	74	1
chr1	66721870	G	C	nonsynonymous SNV	43	1
chr1	66801485	G	C	nonsynonymous SNV	59	1
chr1	66801656	C	T	nonsynonymous SNV	113	1
chr1	66857493	T	C	nonsynonymous SNV	70	0.985714
chr1	67180089	T	C	nonsynonymous SNV	89	1
chr1	68040270	G	C	nonsynonymous SNV	81	0.283951
chr1	68071612	T	C	nonsynonymous SNV	53	1
chr1	6810611	G	C	nonsynonymous SNV	80	0.2125
chr1	6848980	C	T	nonsynonymous SNV	85	1
chr1	68740467	C	T	nonsynonymous SNV	48	0.25
chr1	72585865	C	T	nonsynonymous SNV	53	1
chr1	72586009	A	G	nonsynonymous SNV	95	1
chr1	72586116	T	C	nonsynonymous SNV	103	1
chr1	72586225	T	C	nonsynonymous SNV	106	1
chr1	74016179	G	C	nonsynonymous SNV	49	0.510204
chr1	74129732	G	C	nonsynonymous SNV	39	1
chr1	74282441	T	G	nonsynonymous SNV	53	0.528302
chr1	74287208	A	C	nonsynonymous SNV	59	0.288136
chr1	74380211	A	G	nonsynonymous SNV	103	1
chr1	74466929	A	C	nonsynonymous SNV	118	0.228814
chr1	74479703	A	T	nonsynonymous SNV	110	1
chr1	74506450	G	C	nonsynonymous SNV	31	0.258065
chr1	74523538	C	G	nonsynonymous SNV	99	0.242424
chr1	74567054	C	G	nonsynonymous SNV	45	0.222222
chr1	74590060	G	A	nonsynonymous SNV	76	0.263158
chr1	74747949	G	C	nonsynonymous SNV	69	0.231884
chr1	75406615	A	G	nonsynonymous SNV	52	1
chr1	75421855	A	G	nonsynonymous SNV	33	1
chr1	75472884	A	G	nonsynonymous SNV	131	1
chr1	75486756	G	A	nonsynonymous SNV	57	1
chr1	75491230	G	C	nonsynonymous SNV	44	1
chr1	75493878	G	A	nonsynonymous SNV	94	1
chr1	75498183	T	C	nonsynonymous SNV	71	1
chr1	78664579	G	C	nonsynonymous SNV	87	1
chr1	78665012	G	A	nonsynonymous SNV	65	1
chr1	78665964	C	A	nonsynonymous SNV	69	1
chr1	78666128	G	A	nonsynonymous SNV	65	1
chr1	78817833	A	C	nonsynonymous SNV	63	0.269841
chr1	79435347	G	T	nonsynonymous SNV	60	1
chr1	79436117	T	A	nonsynonymous SNV	86	1
chr1	79436133	C	A	nonsynonymous SNV	90	1
chr1	79778151	G	A	nonsynonymous SNV	67	1
chr1	79779536	A	C	nonsynonymous SNV	33	1
chr1	79779584	A	G	nonsynonymous SNV	38	1
chr1	80200068	A	T	nonsynonymous SNV	54	1
chr1	80200543	A	C	nonsynonymous SNV	47	1
chr1	80213063	T	C	nonsynonymous SNV	38	1
chr1	80283749	C	G	nonsynonymous SNV	74	1
chr1	80532447	C	T	nonsynonymous SNV	43	1
chr1	80574223	A	T	nonsynonymous SNV	30	1
chr1	80592647	C	A	nonsynonymous SNV	75	0.986667
chr1	80592810	C	T	nonsynonymous SNV	75	1
chr1	85099620	G	A	nonsynonymous SNV	174	0.247126
chr1	85100672	C	T	nonsynonymous SNV	37	0.216216
chr1	85247125	G	C	nonsynonymous SNV	233	0.253219
chr1	85247131	G	C	nonsynonymous SNV	230	0.356522
chr1	85579079	T	G	nonsynonymous SNV	216	0.203704
chr1	85610828	T	A	nonsynonymous SNV	271	0.210332
chr1	85615212	C	G	nonsynonymous SNV	204	0.465686
chr1	85637855	C	T	nonsynonymous SNV	58	0.310345
chr1	85643221	A	G	nonsynonymous SNV	104	0.221154
chr1	85659818	G	A	nonsynonymous SNV	112	0.232143
chr1	85907565	G	C	nonsynonymous SNV	44	1
chr1	85940912	T	G	nonsynonymous SNV	99	1
chr1	85941587	A	C	nonsynonymous SNV	47	1
chr1	85941592	A	G	nonsynonymous SNV	45	1
chr1	85941801	T	A	nonsynonymous SNV	44	1
chr1	86160088	C	T	nonsynonymous SNV	83	1
chr1	86213071	T	A	nonsynonymous SNV	145	0.289655
chr1	86306217	A	G	nonsynonymous SNV	77	1
chr1	86387611	A	C	nonsynonymous SNV	46	0.23913
chr1	86426419	C	T	nonsynonymous SNV	46	1
chr1	86426587	A	G	nonsynonymous SNV	63	1
chr1	86426702	C	T	nonsynonymous SNV	127	1
chr1	86426705	A	C	nonsynonymous SNV	128	1
chr1	86426815	G	T	nonsynonymous SNV	165	1
chr1	86427023	T	C	nonsynonymous SNV	122	1
chr1	86427266	A	C	nonsynonymous SNV	67	1
chr1	86427298	G	A	nonsynonymous SNV	56	1
chr1	86427362	C	T	nonsynonymous SNV	48	1
chr1	86596781	T	C	nonsynonymous SNV	40	1
chr1	86821319	G	C	nonsynonymous SNV	85	1
chr1	86959838	G	A	nonsynonymous SNV	66	1
chr1	86990191	C	T	nonsynonymous SNV	73	1
chr1	87127667	G	A	nonsynonymous SNV	29	1
chr1	87151162	T	G	nonsynonymous SNV	50	0.4
chr1	87152854	C	A	nonsynonymous SNV	43	1
chr1	87153384	G	C	nonsynonymous SNV	61	1
chr1	87188130	A	C	nonsynonymous SNV	69	1
chr1	87205848	G	T	nonsynonymous SNV	38	1
chr1	87207535	G	A	nonsynonymous SNV	106	1
chr1	87297741	C	G	nonsynonymous SNV	53	0.226415
chr1	87540708	G	A	nonsynonymous SNV	75	1
chr1	87596548	A	C	nonsynonymous SNV	79	0.253165
chr1	87986124	T	A	nonsynonymous SNV	46	1
chr1	87997904	T	G	nonsynonymous SNV	55	1
chr1	88055558	G	A	nonsynonymous SNV	113	0.256637
chr1	88055569	G	A	nonsynonymous SNV	120	0.241667
chr1	88055582	A	G	nonsynonymous SNV	115	0.234783
chr1	88055614	G	A	nonsynonymous SNV	113	0.292035
chr1	88055742	C	G	nonsynonymous SNV	123	0.276423
chr1	88055852	C	G	nonsynonymous SNV	162	1
chr1	88056242	G	A	nonsynonymous SNV	196	0.295918
chr1	88056308	A	G	nonsynonymous SNV	161	0.36646
chr1	88071245	T	C	nonsynonymous SNV	125	1
chr1	88071365	C	G	nonsynonymous SNV	152	0.953947
chr1	88095157	T	C	nonsynonymous SNV	84	1
chr1	88095265	C	A	nonsynonymous SNV	62	1
chr1	88095272	A	G	nonsynonymous SNV	66	1
chr1	88095320	C	G	nonsynonymous SNV	78	1
chr1	88095542	C	G	nonsynonymous SNV	145	1
chr1	88095806	C	T	nonsynonymous SNV	189	1
chr1	88095810	T	A	nonsynonymous SNV	194	1
chr1	88095896	T	C	nonsynonymous SNV	178	1
chr1	88107639	T	C	nonsynonymous SNV	47	1
chr1	88107641	A	T	nonsynonymous SNV	48	1
chr1	88107737	A	G	nonsynonymous SNV	127	1
chr1	88107758	A	C	nonsynonymous SNV	145	0.344828
chr1	88138673	T	C	nonsynonymous SNV	175	0.234286
chr1	88138777	G	A	nonsynonymous SNV	173	0.99422
chr1	88138783	T	G	nonsynonymous SNV	170	0.994118
chr1	88138791	G	T	nonsynonymous SNV	165	0.993939
chr1	88138838	T	G	nonsynonymous SNV	144	0.972222
chr1	88138844	C	T	nonsynonymous SNV	136	0.955882
chr1	88138847	A	G	nonsynonymous SNV	137	0.948905
chr1	88166064	A	G	nonsynonymous SNV	82	1
chr1	88212093	G	A	nonsynonymous SNV	168	0.785714
chr1	88212117	G	A	nonsynonymous SNV	175	0.411429
chr1	88212141	G	T	nonsynonymous SNV	184	0.782609
chr1	88212238	G	T	nonsynonymous SNV	238	0.428571
chr1	88212317	T	C	nonsynonymous SNV	249	0.807229
chr1	88212392	C	T	nonsynonymous SNV	261	0.777778
chr1	88212528	A	C	nonsynonymous SNV	261	0.796935
chr1	88212549	C	T	nonsynonymous SNV	254	0.775591
chr1	88212599	T	G	nonsynonymous SNV	272	0.422794
chr1	88212657	T	G	nonsynonymous SNV	266	0.402256
chr1	88212740	C	A	nonsynonymous SNV	261	0.743295
chr1	88212764	A	C	nonsynonymous SNV	261	0.452107
chr1	88215074	G	A	nonsynonymous SNV	185	0.216216
chr1	88215122	C	A	nonsynonymous SNV	171	0.444444
chr1	88215123	C	A	nonsynonymous SNV	150	0.506667
chr1	88216213	C	T	nonsynonymous SNV	202	0.712871
chr1	88218146	C	A	nonsynonymous SNV	178	0.780899
chr1	88218254	G	A	nonsynonymous SNV	236	0.550847
chr1	88218260	G	A	nonsynonymous SNV	232	0.405172
chr1	88218303	T	C	nonsynonymous SNV	232	0.206897
chr1	88218338	G	A	nonsynonymous SNV	228	0.451754
chr1	88228379	G	A	nonsynonymous SNV	186	0.209677
chr1	88230650	G	A	nonsynonymous SNV	206	0.742718
chr1	88230746	G	A	nonsynonymous SNV	245	0.212245
chr1	88232324	C	T	nonsynonymous SNV	224	0.803571
chr1	88235442	G	A	nonsynonymous SNV	209	0.803828
chr1	88235480	G	A	nonsynonymous SNV	170	0.452941
chr1	88236665	T	G	nonsynonymous SNV	235	1
chr1	88237477	G	C	nonsynonymous SNV	138	0.362319
chr1	88240149	C	T	nonsynonymous SNV	193	0.818653
chr1	88240695	C	A	nonsynonymous SNV	117	0.264957
chr1	88242780	G	A	nonsynonymous SNV	119	0.294118
chr1	88245989	T	C	nonsynonymous SNV	155	0.580645
chr1	88247140	A	C	nonsynonymous SNV	235	0.774468
chr1	88247237	C	T	nonsynonymous SNV	201	0.60199
chr1	88247763	A	G	nonsynonymous SNV	89	0.865169
chr1	88248621	C	T	nonsynonymous SNV	159	0.716981
chr1	88251267	G	T	nonsynonymous SNV	175	0.742857
chr1	88254883	G	A	nonsynonymous SNV	195	0.251282
chr1	88265258	A	G	nonsynonymous SNV	176	0.488636
chr1	88265267	T	C	nonsynonymous SNV	175	0.314286
chr1	88265309	C	G	nonsynonymous SNV	175	0.222857
chr1	88265570	T	A	nonsynonymous SNV	196	0.75
chr1	88265660	T	C	nonsynonymous SNV	204	0.22549
chr1	88265674	G	C	nonsynonymous SNV	199	0.221106
chr1	88265824	T	C	nonsynonymous SNV	231	0.207792
chr1	88265887	T	C	nonsynonymous SNV	239	0.280335
chr1	88265896	C	T	nonsynonymous SNV	240	0.2875
chr1	88265977	A	G	nonsynonymous SNV	247	0.275304
chr1	88265980	T	G	nonsynonymous SNV	250	0.392
chr1	88266046	A	C	nonsynonymous SNV	264	0.287879
chr1	88266121	G	A	nonsynonymous SNV	252	0.301587
chr1	88266400	G	A	nonsynonymous SNV	170	0.229412
chr1	88266452	C	T	nonsynonymous SNV	169	0.278107
chr1	88266616	T	C	nonsynonymous SNV	196	0.22449
chr1	88270269	A	G	nonsynonymous SNV	117	0.350427
chr1	88277378	G	T	nonsynonymous SNV	94	0.617021
chr1	88277413	A	C	nonsynonymous SNV	69	0.550725
chr1	88277422	C	A	nonsynonymous SNV	87	0.643678
chr1	88277433	G	C	nonsynonymous SNV	85	0.376471
chr1	88277442	T	A	nonsynonymous SNV	72	0.638889
chr1	88509838	T	C	nonsynonymous SNV	139	1
chr1	90775615	T	C	nonsynonymous SNV	26	1
chr1	90822107	C	T	nonsynonymous SNV	77	1
chr1	90828130	T	C	nonsynonymous SNV	76	1
chr1	90828249	A	G	nonsynonymous SNV	118	0.991525
chr1	90830160	T	C	nonsynonymous SNV	52	1
chr1	90830166	G	A	nonsynonymous SNV	50	1
chr1	90830182	G	A	nonsynonymous SNV	55	1
chr1	90933405	A	G	nonsynonymous SNV	40	1
chr1	90964246	C	G	nonsynonymous SNV	51	1
chr1	91088691	T	C	nonsynonymous SNV	95	1
chr1	91115186	G	A	nonsynonymous SNV	33	1
chr1	91115247	C	A	nonsynonymous SNV	27	1
chr1	91115879	A	G	nonsynonymous SNV	41	1
chr1	91115900	G	C	nonsynonymous SNV	39	1
chr1	91115920	A	T	nonsynonymous SNV	37	1
chr1	91115934	C	A	nonsynonymous SNV	37	1
chr1	91153115	C	G	nonsynonymous SNV	100	1
chr1	91153385	G	C	nonsynonymous SNV	46	1
chr1	91153394	A	G	nonsynonymous SNV	45	1
chr1	91153431	G	C	nonsynonymous SNV	38	1
chr1	91153434	T	C	nonsynonymous SNV	40	1
chr1	91153451	A	G	nonsynonymous SNV	36	1
chr1	91153473	C	T	nonsynonymous SNV	41	1
chr1	91153502	G	C	nonsynonymous SNV	39	1
chr1	91153924	A	G	nonsynonymous SNV	89	1
chr1	91153945	T	C	nonsynonymous SNV	92	1
chr1	91155431	C	G	nonsynonymous SNV	55	1
chr1	91155452	A	G	nonsynonymous SNV	52	1
chr1	91155454	A	G	nonsynonymous SNV	51	1
chr1	91162400	T	C	nonsynonymous SNV	78	1
chr1	91162412	G	A	nonsynonymous SNV	81	1
chr1	91162437	A	G	nonsynonymous SNV	69	1
chr1	91164929	A	G	nonsynonymous SNV	69	1
chr1	91167011	T	C	nonsynonymous SNV	98	1
chr1	91168748	C	T	nonsynonymous SNV	55	0.327273
chr1	91309887	T	C	nonsynonymous SNV	52	1
chr1	91345761	G	A	nonsynonymous SNV	29	1
chr1	91445550	C	G	nonsynonymous SNV	79	1
chr1	91505448	G	A	nonsynonymous SNV	88	1
chr1	92491156	A	C	nonsynonymous SNV	119	0.445378
chr1	92588722	G	C	nonsynonymous SNV	110	0.245455
chr1	92896114	T	G	nonsynonymous SNV	74	0.432432
chr1	93006521	G	A	nonsynonymous SNV	66	1
chr1	93012100	G	A	nonsynonymous SNV	45	1
chr1	93023003	C	G	nonsynonymous SNV	61	0.245902
chr1	93286050	C	G	nonsynonymous SNV	76	0.276316
chr1	93304661	C	T	nonsynonymous SNV	111	1
chr1	93304940	T	C	nonsynonymous SNV	118	1
chr1	93321182	G	A	nonsynonymous SNV	111	1
chr1	93579846	A	G	nonsynonymous SNV	82	1
chr1	93780748	T	C	nonsynonymous SNV	39	1
chr1	93785926	C	A	nonsynonymous SNV	73	1
chr1	93938658	G	T	nonsynonymous SNV	78	1
chr1	94006953	C	T	nonsynonymous SNV	118	1
chr1	94039466	T	C	nonsynonymous SNV	25	0.28
chr1	9545621	A	T	nonsynonymous SNV	23	0.26087
chr1	9545654	G	A	nonsynonymous SNV	23	0.26087
chr1	9545894	G	T	nonsynonymous SNV	26	0.423077
chr1	9545925	C	A	nonsynonymous SNV	34	0.323529
chr1	9545951	G	T	nonsynonymous SNV	43	0.27907
chr1	9545992	C	G	nonsynonymous SNV	53	0.226415
chr1	9546013	G	T	nonsynonymous SNV	59	0.271186
chr1	9546016	G	A	nonsynonymous SNV	61	0.245902
chr1	9546196	G	A	nonsynonymous SNV	59	0.745763
chr1	9546215	C	T	nonsynonymous SNV	57	0.22807
chr1	9546223	C	T	nonsynonymous SNV	55	0.236364
chr1	9546452	G	A	nonsynonymous SNV	51	0.254902
chr1	9546478	C	T	nonsynonymous SNV	45	0.244444
chr1	9546533	G	A	nonsynonymous SNV	42	0.238095
chr1	9546550	C	A	nonsynonymous SNV	45	0.8
chr1	9546556	T	A	nonsynonymous SNV	46	0.804348
chr1	9553377	G	T	nonsynonymous SNV	47	1
chr1	95660864	C	T	nonsynonymous SNV	64	0.453125
chr1	9724699	A	G	nonsynonymous SNV	94	1
chr1	97784759	G	A	nonsynonymous SNV	61	1
chr1	9937100	G	A	nonsynonymous SNV	66	1
chr1	9940386	C	G	nonsynonymous SNV	94	1
chr1	9978944	A	T	nonsynonymous SNV	29	1
chr1	99967213	A	C	nonsynonymous SNV	48	1
chr1	99967372	G	A	nonsynonymous SNV	66	1
chr10	103025362	G	A	nonsynonymous SNV	64	0.625
chr10	103170494	C	G	nonsynonymous SNV	66	1
chr10	103170758	C	A	nonsynonymous SNV	51	1
chr10	103215190	T	G	nonsynonymous SNV	116	0.689655
chr10	103234038	T	C	nonsynonymous SNV	31	0.354839
chr10	104196102	A	C	nonsynonymous SNV	82	0.231707
chr10	106863289	A	C	nonsynonymous SNV	41	0.365854
chr10	106966959	G	T	nonsynonymous SNV	83	0.409639
chr10	107608216	T	C	nonsynonymous SNV	49	1
chr10	107608242	G	T	nonsynonymous SNV	54	1
chr10	107635488	C	A	nonsynonymous SNV	30	1
chr10	107646613	A	G	nonsynonymous SNV	63	1
chr10	107686588	G	A	nonsynonymous SNV	56	1
chr10	108262366	A	G	nonsynonymous SNV	56	0.232143
chr10	110765698	G	C	nonsynonymous SNV	103	0.31068
chr10	112165744	C	G	nonsynonymous SNV	50	0.32
chr10	112177901	G	C	nonsynonymous SNV	51	1
chr10	112177943	G	C	nonsynonymous SNV	41	1
chr10	112177982	A	G	nonsynonymous SNV	35	1
chr10	112200712	G	T	nonsynonymous SNV	77	1
chr10	115453089	G	A	nonsynonymous SNV	75	0.36
chr10	115587392	G	C	nonsynonymous SNV	24	0.291667
chr10	117074725	A	C	nonsynonymous SNV	72	0.263889
chr10	119985534	G	A	nonsynonymous SNV	89	1
chr10	121266896	C	T	nonsynonymous SNV	55	1
chr10	121596236	T	C	nonsynonymous SNV	66	0.363636
chr10	121601341	T	C	nonsynonymous SNV	62	1
chr10	121667433	T	C	nonsynonymous SNV	54	1
chr10	121667492	A	G	nonsynonymous SNV	58	1
chr10	121667544	A	G	nonsynonymous SNV	68	1
chr10	121667584	C	A	nonsynonymous SNV	61	1
chr10	121667639	C	T	nonsynonymous SNV	76	1
chr10	121677356	T	C	nonsynonymous SNV	73	1
chr10	12442070	G	C	nonsynonymous SNV	24	0.25
chr10	125966587	C	A	nonsynonymous SNV	21	1
chr10	126014727	C	T	nonsynonymous SNV	38	1
chr10	127018451	A	T	nonsynonymous SNV	90	0.355556
chr10	127284343	C	T	nonsynonymous SNV	57	0.245614
chr10	127285805	T	G	nonsynonymous SNV	45	0.311111
chr10	127573043	T	G	nonsynonymous SNV	43	0.27907
chr10	127576612	G	C	nonsynonymous SNV	29	0.310345
chr10	127583885	T	C	nonsynonymous SNV	31	0.290323
chr10	127584690	C	T	nonsynonymous SNV	56	0.232143
chr10	127743197	T	G	nonsynonymous SNV	43	0.418605
chr10	128020149	C	G	nonsynonymous SNV	63	0.238095
chr10	128200220	A	C	nonsynonymous SNV	24	0.5
chr10	128211084	C	G	nonsynonymous SNV	98	0.27551
chr10	128578426	T	G	nonsynonymous SNV	67	0.298507
chr10	128802382	C	G	nonsynonymous SNV	74	0.202703
chr10	128939068	G	C	nonsynonymous SNV	70	0.228571
chr10	129011623	T	A	nonsynonymous SNV	91	1
chr10	129046514	C	T	nonsynonymous SNV	218	1
chr10	129079874	A	G	nonsynonymous SNV	182	1
chr10	129112130	C	G	nonsynonymous SNV	143	0.20979
chr10	129333435	T	C	nonsynonymous SNV	154	0.422078
chr10	129351337	C	T	nonsynonymous SNV	114	1
chr10	129410145	T	C	nonsynonymous SNV	92	1
chr10	12941425	T	G	nonsynonymous SNV	54	0.222222
chr10	129437600	G	A	nonsynonymous SNV	54	1
chr10	129463330	C	G	nonsynonymous SNV	40	1
chr10	129500890	C	T	nonsynonymous SNV	33	1
chr10	129500899	C	G	nonsynonymous SNV	37	1
chr10	129501064	A	T	nonsynonymous SNV	82	1
chr10	129540731	T	G	nonsynonymous SNV	144	1
chr10	129571290	G	A	nonsynonymous SNV	49	1
chr10	129571595	G	T	nonsynonymous SNV	96	1
chr10	129647134	A	G	nonsynonymous SNV	131	1
chr10	129670433	G	T	nonsynonymous SNV	136	1
chr10	129874378	T	G	nonsynonymous SNV	161	0.254658
chr10	129911997	T	A	nonsynonymous SNV	170	1
chr10	129912089	T	A	nonsynonymous SNV	167	0.269461
chr10	129912164	G	A	nonsynonymous SNV	166	1
chr10	130386015	T	G	nonsynonymous SNV	254	0.212598
chr10	130390968	T	A	nonsynonymous SNV	198	0.287879
chr10	130446414	T	G	nonsynonymous SNV	259	0.467181
chr10	130497197	A	C	nonsynonymous SNV	75	0.44
chr10	14129486	G	C	nonsynonymous SNV	52	0.307692
chr10	14426996	C	T	nonsynonymous SNV	42	0.333333
chr10	18018841	C	T	nonsynonymous SNV	28	1
chr10	18677892	A	C	nonsynonymous SNV	56	0.410714
chr10	19002963	A	G	nonsynonymous SNV	31	1
chr10	19003739	T	G	nonsynonymous SNV	41	1
chr10	19004840	C	T	nonsynonymous SNV	40	1
chr10	19005008	G	C	nonsynonymous SNV	48	1
chr10	19849087	C	T	nonsynonymous SNV	60	1
chr10	20208761	G	A	nonsynonymous SNV	137	1
chr10	20208789	G	C	nonsynonymous SNV	102	1
chr10	20208793	A	T	nonsynonymous SNV	132	1
chr10	20208806	G	A	nonsynonymous SNV	133	0.766917
chr10	20357533	G	A	nonsynonymous SNV	87	0.471264
chr10	20357576	G	A	nonsynonymous SNV	84	0.404762
chr10	21072573	C	T	nonsynonymous SNV	46	1
chr10	21145175	T	C	nonsynonymous SNV	41	1
chr10	22067347	A	G	nonsynonymous SNV	130	1
chr10	22067361	T	C	nonsynonymous SNV	139	1
chr10	22067386	C	A	nonsynonymous SNV	117	1
chr10	22067388	T	C	nonsynonymous SNV	118	1
chr10	22067389	G	T	nonsynonymous SNV	117	1
chr10	22067568	C	T	nonsynonymous SNV	169	1
chr10	22067620	A	T	nonsynonymous SNV	98	1
chr10	22067624	G	C	nonsynonymous SNV	99	1
chr10	22067645	A	C	nonsynonymous SNV	88	1
chr10	22067709	T	C	nonsynonymous SNV	31	0.225806
chr10	22067994	A	C	nonsynonymous SNV	25	1
chr10	22148499	A	T	nonsynonymous SNV	36	0.25
chr10	22148507	T	C	nonsynonymous SNV	34	0.735294
chr10	22148509	T	A	nonsynonymous SNV	34	0.735294
chr10	22148547	C	T	nonsynonymous SNV	27	0.740741
chr10	22148553	A	G	nonsynonymous SNV	29	0.758621
chr10	22148562	A	T	nonsynonymous SNV	23	1
chr10	22174366	A	C	nonsynonymous SNV	207	0.246377
chr10	22174387	A	G	nonsynonymous SNV	203	0.211823
chr10	22283497	A	G	nonsynonymous SNV	143	0.314685
chr10	22283537	A	T	nonsynonymous SNV	120	0.233333
chr10	22285726	C	T	nonsynonymous SNV	217	0.511521
chr10	22285733	C	A	nonsynonymous SNV	219	0.237443
chr10	22285799	G	A	nonsynonymous SNV	202	0.207921
chr10	22285810	G	A	nonsynonymous SNV	186	0.569892
chr10	22285846	C	A	nonsynonymous SNV	171	0.274854
chr10	22286197	G	A	nonsynonymous SNV	211	0.383886
chr10	22286303	C	G	nonsynonymous SNV	193	0.792746
chr10	22286340	G	T	nonsynonymous SNV	191	0.204188
chr10	22286377	T	C	nonsynonymous SNV	179	0.324022
chr10	22287060	A	C	nonsynonymous SNV	112	0.464286
chr10	22287072	T	C	nonsynonymous SNV	120	0.458333
chr10	22287086	A	C	nonsynonymous SNV	126	0.404762
chr10	22287087	A	G	nonsynonymous SNV	130	0.2
chr10	22287095	A	G	nonsynonymous SNV	136	0.647059
chr10	22287126	C	T	nonsynonymous SNV	154	0.428571
chr10	22287129	A	G	nonsynonymous SNV	154	0.298701
chr10	22287144	C	A	nonsynonymous SNV	167	0.42515
chr10	22287158	T	G	nonsynonymous SNV	146	0.30137
chr10	22287191	A	T	nonsynonymous SNV	171	0.385965
chr10	22371043	C	T	nonsynonymous SNV	171	0.251462
chr10	22371045	C	G	nonsynonymous SNV	167	0.491018
chr10	22371050	A	C	nonsynonymous SNV	165	0.50303
chr10	22371072	G	A	nonsynonymous SNV	160	0.225
chr10	22371580	G	A	nonsynonymous SNV	213	0.690141
chr10	23856262	A	G	nonsynonymous SNV	65	1
chr10	23864425	A	G	nonsynonymous SNV	78	1
chr10	23864561	T	C	nonsynonymous SNV	50	1
chr10	23865831	G	A	nonsynonymous SNV	47	1
chr10	23894883	T	C	nonsynonymous SNV	57	1
chr10	25506260	C	G	nonsynonymous SNV	73	0.328767
chr10	26230848	A	G	nonsynonymous SNV	56	1
chr10	26984458	C	T	nonsynonymous SNV	33	1
chr10	27105138	C	T	nonsynonymous SNV	116	1
chr10	27120050	G	T	nonsynonymous SNV	62	1
chr10	27212223	T	C	nonsynonymous SNV	38	1
chr10	27265066	T	C	nonsynonymous SNV	66	1
chr10	28075160	T	A	nonsynonymous SNV	35	1
chr10	28592783	C	T	nonsynonymous SNV	46	0.23913
chr10	29147331	A	C	nonsynonymous SNV	26	0.269231
chr10	3120209	A	G	nonsynonymous SNV	97	1
chr10	3120231	A	G	nonsynonymous SNV	97	1
chr10	3125031	G	A	nonsynonymous SNV	44	1
chr10	3125055	G	C	nonsynonymous SNV	52	1
chr10	3125193	C	T	nonsynonymous SNV	40	1
chr10	3259751	A	G	nonsynonymous SNV	37	0.378378
chr10	3259783	T	G	nonsynonymous SNV	34	0.205882
chr10	33909368	C	G	nonsynonymous SNV	49	0.204082
chr10	33930213	A	C	nonsynonymous SNV	73	0.328767
chr10	3978708	T	C	nonsynonymous SNV	79	1
chr10	4007800	T	C	nonsynonymous SNV	64	1
chr10	40920397	T	C	nonsynonymous SNV	58	0.37931
chr10	4354911	A	G	nonsynonymous SNV	95	0.652632
chr10	4368919	C	G	nonsynonymous SNV	66	0.318182
chr10	4369441	T	G	nonsynonymous SNV	82	1
chr10	43997311	C	T	nonsynonymous SNV	41	1
chr10	4966154	G	T	nonsynonymous SNV	39	1
chr10	50618207	A	C	nonsynonymous SNV	54	0.462963
chr10	51491984	A	T	nonsynonymous SNV	121	0.652893
chr10	51725441	A	C	nonsynonymous SNV	88	0.568182
chr10	5324099	G	T	nonsynonymous SNV	70	1
chr10	5327382	A	C	nonsynonymous SNV	37	1
chr10	5330324	C	G	nonsynonymous SNV	35	1
chr10	53538569	A	C	nonsynonymous SNV	76	0.618421
chr10	5405426	C	T	nonsynonymous SNV	38	1
chr10	5604520	C	T	nonsynonymous SNV	34	1
chr10	58231225	C	T	nonsynonymous SNV	153	0.509804
chr10	58231226	T	C	nonsynonymous SNV	152	0.506579
chr10	58231344	C	G	nonsynonymous SNV	271	0.926199
chr10	58231489	G	A	nonsynonymous SNV	180	0.838889
chr10	58231676	A	C	nonsynonymous SNV	100	0.35
chr10	58231704	A	C	nonsynonymous SNV	83	0.204819
chr10	58231705	A	T	nonsynonymous SNV	84	0.202381
chr10	58231706	A	G	nonsynonymous SNV	86	0.209302
chr10	58231793	T	C	nonsynonymous SNV	164	0.634146
chr10	58231924	T	C	nonsynonymous SNV	284	0.426056
chr10	58231988	T	C	nonsynonymous SNV	265	0.815094
chr10	58232062	C	T	nonsynonymous SNV	226	0.787611
chr10	58232102	T	C	nonsynonymous SNV	213	0.840376
chr10	58232305	C	A	nonsynonymous SNV	87	0.643678
chr10	58232561	C	T	nonsynonymous SNV	253	0.881423
chr10	58232608	A	G	nonsynonymous SNV	183	0.803279
chr10	58461853	T	G	nonsynonymous SNV	72	0.430556
chr10	59425418	A	T	nonsynonymous SNV	56	0.392857
chr10	60403248	C	G	nonsynonymous SNV	41	0.317073
chr10	60419740	C	T	nonsynonymous SNV	46	0.304348
chr10	60436821	A	C	nonsynonymous SNV	32	0.59375
chr10	61271025	G	T	nonsynonymous SNV	21	0.333333
chr10	61302953	G	C	nonsynonymous SNV	53	0.320755
chr10	62109017	T	G	nonsynonymous SNV	38	0.236842
chr10	62395208	G	C	nonsynonymous SNV	123	0.260163
chr10	62937471	G	C	nonsynonymous SNV	84	0.380952
chr10	67238174	T	C	nonsynonymous SNV	39	1
chr10	68097837	G	A	nonsynonymous SNV	66	0.393939
chr10	74222427	A	C	nonsynonymous SNV	55	0.2
chr10	75246698	G	C	nonsynonymous SNV	32	0.28125
chr10	75726897	C	A	nonsynonymous SNV	27	0.62963
chr10	75815258	G	C	nonsynonymous SNV	44	0.295455
chr10	76392837	C	G	nonsynonymous SNV	40	0.3
chr10	76711626	T	G	nonsynonymous SNV	53	0.320755
chr10	7676329	G	A	nonsynonymous SNV	27	1
chr10	76800861	T	A	nonsynonymous SNV	33	0.69697
chr10	77042460	C	G	nonsynonymous SNV	43	0.372093
chr10	77268562	T	A	nonsynonymous SNV	107	0.64486
chr10	7741513	T	C	nonsynonymous SNV	60	1
chr10	77561116	C	G	nonsynonymous SNV	41	0.365854
chr10	78052779	G	A	nonsynonymous SNV	33	0.212121
chr10	7814789	T	C	nonsynonymous SNV	41	0.829268
chr10	78163475	C	A	nonsynonymous SNV	48	0.3125
chr10	78179042	C	A	nonsynonymous SNV	45	0.266667
chr10	7821178	C	A	nonsynonymous SNV	43	1
chr10	78611840	G	A	nonsynonymous SNV	54	0.37037
chr10	7867339	C	G	nonsynonymous SNV	25	0.32
chr10	7867372	T	C	nonsynonymous SNV	24	1
chr10	79194453	A	C	nonsynonymous SNV	208	0.379808
chr10	79612443	C	G	nonsynonymous SNV	26	0.384615
chr10	79740211	G	C	nonsynonymous SNV	31	0.354839
chr10	79826617	A	C	nonsynonymous SNV	54	0.555556
chr10	79862758	G	A	nonsynonymous SNV	129	0.263566
chr10	79862800	A	G	nonsynonymous SNV	132	0.242424
chr10	79978230	G	C	nonsynonymous SNV	22	0.409091
chr10	79998122	A	G	nonsynonymous SNV	38	0.421053
chr10	80060657	G	C	nonsynonymous SNV	39	0.384615
chr10	80170239	G	C	nonsynonymous SNV	49	0.22449
chr10	80170452	G	C	nonsynonymous SNV	27	0.259259
chr10	80293992	G	C	nonsynonymous SNV	125	0.352
chr10	80314719	C	G	nonsynonymous SNV	62	0.290323
chr10	80315661	G	T	nonsynonymous SNV	26	0.307692
chr10	80864099	G	C	nonsynonymous SNV	72	0.333333
chr10	80890421	C	G	nonsynonymous SNV	42	0.285714
chr10	80904594	C	G	nonsynonymous SNV	72	0.458333
chr10	80931102	C	G	nonsynonymous SNV	58	0.241379
chr10	81190403	G	A	nonsynonymous SNV	58	0.344828
chr10	81275198	G	C	nonsynonymous SNV	23	0.347826
chr10	81341633	T	G	nonsynonymous SNV	60	0.266667
chr10	81371195	G	C	nonsynonymous SNV	40	0.3
chr10	81386444	A	C	nonsynonymous SNV	108	0.324074
chr10	8207505	A	G	nonsynonymous SNV	37	1
chr10	84527714	T	G	nonsynonymous SNV	30	1
chr10	84528040	A	C	nonsynonymous SNV	58	1
chr10	84622515	A	G	nonsynonymous SNV	23	1
chr10	85098305	T	C	nonsynonymous SNV	88	0.261364
chr10	85120076	C	T	nonsynonymous SNV	95	1
chr10	85120326	T	C	nonsynonymous SNV	105	1
chr10	85120479	T	C	nonsynonymous SNV	139	1
chr10	85143082	T	C	nonsynonymous SNV	59	1
chr10	85903002	G	T	nonsynonymous SNV	46	1
chr10	85979294	A	C	nonsynonymous SNV	49	1
chr10	86057395	G	A	nonsynonymous SNV	64	1
chr10	86467097	C	T	nonsynonymous SNV	32	1
chr10	86713157	G	T	nonsynonymous SNV	80	0.3875
chr10	86724316	C	G	nonsynonymous SNV	50	1
chr10	86733771	G	A	nonsynonymous SNV	46	1
chr10	86736859	C	G	nonsynonymous SNV	85	1
chr10	86776504	G	C	nonsynonymous SNV	64	1
chr10	86933391	T	C	nonsynonymous SNV	50	0.24
chr10	86955062	G	A	nonsynonymous SNV	42	1
chr10	87230411	A	C	nonsynonymous SNV	45	0.266667
chr10	8725513	C	T	nonsynonymous SNV	29	1
chr10	87492603	G	C	nonsynonymous SNV	26	0.307692
chr10	88114645	C	T	nonsynonymous SNV	30	1
chr10	88133128	T	G	nonsynonymous SNV	83	1
chr10	88419170	T	C	nonsynonymous SNV	28	1
chr10	88433789	T	A	nonsynonymous SNV	45	1
chr10	88433885	A	G	nonsynonymous SNV	73	1
chr10	88433888	C	G	nonsynonymous SNV	74	0.554054
chr10	88436479	C	G	nonsynonymous SNV	59	1
chr10	88477098	T	G	nonsynonymous SNV	40	0.7
chr10	88489667	G	C	nonsynonymous SNV	42	0.428571
chr10	88536450	T	C	nonsynonymous SNV	49	0.326531
chr10	88904972	A	G	nonsynonymous SNV	47	0.276596
chr10	89413540	G	A	nonsynonymous SNV	39	1
chr10	89413703	C	T	nonsynonymous SNV	52	1
chr10	89421516	G	A	nonsynonymous SNV	65	1
chr10	89480555	G	A	nonsynonymous SNV	24	1
chr10	89483407	T	C	nonsynonymous SNV	76	1
chr10	89498397	C	T	nonsynonymous SNV	26	1
chr10	89577918	C	A	nonsynonymous SNV	39	1
chr10	89717207	A	G	nonsynonymous SNV	76	1
chr10	89804740	G	A	nonsynonymous SNV	61	0.409836
chr10	89805511	T	C	nonsynonymous SNV	58	1
chr10	89805549	A	G	nonsynonymous SNV	51	1
chr10	89808612	G	C	nonsynonymous SNV	22	0.954545
chr10	91095828	A	G	nonsynonymous SNV	92	1
chr10	91095986	T	G	nonsynonymous SNV	65	1
chr10	91096507	C	A	nonsynonymous SNV	38	1
chr10	91102056	G	A	nonsynonymous SNV	63	1
chr10	91118802	C	G	nonsynonymous SNV	65	0.246154
chr10	91149607	C	T	nonsynonymous SNV	95	1
chr10	92691895	G	A	nonsynonymous SNV	36	1
chr10	93038971	T	C	nonsynonymous SNV	36	1
chr10	93039159	C	T	nonsynonymous SNV	30	1
chr10	93069882	T	C	nonsynonymous SNV	53	1
chr10	93254740	A	C	nonsynonymous SNV	40	1
chr10	93265081	G	C	nonsynonymous SNV	39	0.974359
chr10	93265185	T	C	nonsynonymous SNV	31	1
chr10	93265293	C	T	nonsynonymous SNV	33	1
chr10	93474948	A	G	nonsynonymous SNV	35	1
chr10	93484722	A	G	nonsynonymous SNV	138	0.565217
chr10	93514082	G	A	nonsynonymous SNV	80	0.2375
chr10	93514121	A	C	nonsynonymous SNV	83	0.325301
chr10	93516245	C	T	nonsynonymous SNV	90	0.611111
chr10	93567732	T	C	nonsynonymous SNV	45	1
chr10	93734207	G	A	nonsynonymous SNV	40	1
chr10	93846041	C	T	nonsynonymous SNV	44	1
chr10	93846147	T	C	nonsynonymous SNV	30	1
chr10	93846485	A	G	nonsynonymous SNV	36	1
chr10	93846678	C	G	nonsynonymous SNV	52	1
chr10	93846720	T	C	nonsynonymous SNV	57	1
chr10	93984320	A	T	nonsynonymous SNV	28	1
chr10	93984418	A	T	nonsynonymous SNV	34	1
chr10	93997017	A	C	nonsynonymous SNV	53	1
chr10	94004034	A	G	nonsynonymous SNV	61	0.983607
chr10	94006961	C	T	nonsynonymous SNV	78	1
chr10	94043662	A	T	nonsynonymous SNV	47	1
chr10	94044070	G	A	nonsynonymous SNV	75	1
chr10	94044142	T	A	nonsynonymous SNV	56	1
chr10	94044327	T	A	nonsynonymous SNV	33	1
chr10	94044388	T	C	nonsynonymous SNV	43	1
chr10	94044834	T	C	nonsynonymous SNV	96	1
chr10	94045194	G	A	nonsynonymous SNV	54	1
chr10	94074205	A	C	nonsynonymous SNV	35	1
chr10	94163743	G	T	nonsynonymous SNV	70	1
chr10	94172021	T	A	nonsynonymous SNV	43	1
chr10	94172024	G	T	nonsynonymous SNV	43	1
chr10	97694033	G	A	nonsynonymous SNV	31	0.322581
chr11	100027485	T	C	nonsynonymous SNV	137	0.664234
chr11	100749686	G	C	nonsynonymous SNV	23	0.391304
chr11	100964370	G	C	nonsynonymous SNV	68	0.323529
chr11	101021123	T	G	nonsynonymous SNV	33	0.69697
chr11	101083490	C	G	nonsynonymous SNV	62	0.322581
chr11	101102012	A	C	nonsynonymous SNV	40	0.775
chr11	101331653	T	G	nonsynonymous SNV	101	0.29703
chr11	101569315	A	C	nonsynonymous SNV	88	0.386364
chr11	102061510	C	G	nonsynonymous SNV	39	0.307692
chr11	102437979	C	G	nonsynonymous SNV	46	0.26087
chr11	102479295	A	C	nonsynonymous SNV	72	0.652778
chr11	103117673	G	A	nonsynonymous SNV	33	0.69697
chr11	103543024	T	A	nonsynonymous SNV	101	0.712871
chr11	103613515	A	C	nonsynonymous SNV	78	0.628205
chr11	106020157	G	C	nonsynonymous SNV	31	0.774194
chr11	106779016	C	G	nonsynonymous SNV	79	0.253165
chr11	107234396	T	A	nonsynonymous SNV	63	0.285714
chr11	110152021	C	G	nonsynonymous SNV	55	0.690909
chr11	113688472	G	A	nonsynonymous SNV	45	0.333333
chr11	114791810	G	C	nonsynonymous SNV	24	0.375
chr11	115318583	C	T	nonsynonymous SNV	45	0.644444
chr11	115344982	T	A	nonsynonymous SNV	46	0.26087
chr11	115988934	C	G	nonsynonymous SNV	30	0.466667
chr11	116007563	C	G	nonsynonymous SNV	36	0.472222
chr11	116106094	C	G	nonsynonymous SNV	33	0.575758
chr11	116985001	C	T	nonsynonymous SNV	61	0.360656
chr11	117722758	C	G	nonsynonymous SNV	39	0.358974
chr11	117772956	G	C	nonsynonymous SNV	38	0.263158
chr11	118411486	G	C	nonsynonymous SNV	24	0.583333
chr11	119284135	C	G	nonsynonymous SNV	36	0.611111
chr11	119442085	G	C	nonsynonymous SNV	67	0.343284
chr11	119443411	C	G	nonsynonymous SNV	56	0.714286
chr11	120021464	A	C	nonsynonymous SNV	33	0.424242
chr11	120070374	T	G	nonsynonymous SNV	43	0.674419
chr11	120272270	G	C	nonsynonymous SNV	28	0.321429
chr11	120272892	A	T	nonsynonymous SNV	21	0.809524
chr11	120457018	G	C	nonsynonymous SNV	51	0.411765
chr11	120537785	A	T	nonsynonymous SNV	83	0.457831
chr11	120785793	G	C	nonsynonymous SNV	46	0.543478
chr11	120791871	G	A	nonsynonymous SNV	85	0.364706
chr11	121842326	T	G	nonsynonymous SNV	85	0.741176
chr11	16908901	G	A	nonsynonymous SNV	66	0.590909
chr11	23667344	G	C	nonsynonymous SNV	43	0.674419
chr11	29463809	A	C	nonsynonymous SNV	63	0.333333
chr11	3187367	T	C	nonsynonymous SNV	252	0.948413
chr11	32615865	G	C	nonsynonymous SNV	48	0.479167
chr11	33161207	C	G	nonsynonymous SNV	108	0.287037
chr11	33504701	A	G	nonsynonymous SNV	37	0.378378
chr11	34090669	C	G	nonsynonymous SNV	50	0.3
chr11	34205634	G	C	nonsynonymous SNV	42	0.595238
chr11	35632798	A	C	nonsynonymous SNV	57	0.298246
chr11	40680091	G	A	nonsynonymous SNV	34	1
chr11	40685284	G	C	nonsynonymous SNV	68	0.294118
chr11	40710089	C	T	nonsynonymous SNV	134	0.171642
chr11	40710094	T	A	nonsynonymous SNV	148	0.209459
chr11	40710157	A	T	nonsynonymous SNV	127	0.748031
chr11	40714002	G	T	nonsynonymous SNV	58	1
chr11	40723403	C	A	nonsynonymous SNV	24	1
chr11	40723416	G	C	nonsynonymous SNV	26	1
chr11	40754044	A	C	nonsynonymous SNV	50	1
chr11	42317445	T	G	nonsynonymous SNV	49	0.22449
chr11	42593839	A	G	nonsynonymous SNV	74	0.635135
chr11	43153305	A	G	nonsynonymous SNV	36	1
chr11	43259639	G	A	nonsynonymous SNV	60	1
chr11	43424829	C	A	nonsynonymous SNV	42	1
chr11	43425589	T	A	nonsynonymous SNV	67	1
chr11	43425625	G	T	nonsynonymous SNV	66	1
chr11	46143817	T	G	nonsynonymous SNV	58	0.293103
chr11	46242407	G	C	nonsynonymous SNV	39	0.25641
chr11	48807564	G	C	nonsynonymous SNV	47	0.425532
chr11	49443889	T	A	nonsynonymous SNV	130	0.553846
chr11	50171204	G	A	nonsynonymous SNV	37	0.513514
chr11	50668069	C	G	nonsynonymous SNV	25	0.28
chr11	5071010	C	G	nonsynonymous SNV	30	0.533333
chr11	50901177	G	A	nonsynonymous SNV	45	0.666667
chr11	5106936	C	G	nonsynonymous SNV	30	0.233333
chr11	51253878	T	C	nonsynonymous SNV	43	0.372093
chr11	51275535	T	G	nonsynonymous SNV	39	0.538462
chr11	53265064	T	G	nonsynonymous SNV	123	0.268293
chr11	53772926	G	C	nonsynonymous SNV	43	0.348837
chr11	55270406	G	C	nonsynonymous SNV	42	0.857143
chr11	55284361	A	G	nonsynonymous SNV	47	0.297872
chr11	57484032	A	G	nonsynonymous SNV	41	1
chr11	57490114	G	A	nonsynonymous SNV	31	1
chr11	57499755	C	T	nonsynonymous SNV	46	1
chr11	57499797	T	C	nonsynonymous SNV	45	1
chr11	57514234	C	T	nonsynonymous SNV	47	1
chr11	57528040	A	T	nonsynonymous SNV	61	1
chr11	57528076	G	A	nonsynonymous SNV	58	1
chr11	57765688	G	A	nonsynonymous SNV	37	1
chr11	58042340	G	A	nonsynonymous SNV	49	1
chr11	58122289	C	G	nonsynonymous SNV	54	1
chr11	58125218	T	C	nonsynonymous SNV	54	1
chr11	58130071	T	C	nonsynonymous SNV	32	1
chr11	58139510	C	G	nonsynonymous SNV	59	1
chr11	58139575	C	G	nonsynonymous SNV	52	1
chr11	58171695	G	A	nonsynonymous SNV	54	1
chr11	58187802	T	C	nonsynonymous SNV	43	1
chr11	58188081	A	T	nonsynonymous SNV	46	1
chr11	58188239	G	A	nonsynonymous SNV	69	1
chr11	58188419	G	A	nonsynonymous SNV	63	0.444444
chr11	58206498	T	A	nonsynonymous SNV	108	1
chr11	58206965	C	G	nonsynonymous SNV	64	1
chr11	58207118	C	G	nonsynonymous SNV	82	1
chr11	58219513	T	A	nonsynonymous SNV	45	1
chr11	58219563	A	G	nonsynonymous SNV	46	1
chr11	58219912	T	C	nonsynonymous SNV	75	1
chr11	58219954	T	C	nonsynonymous SNV	69	1
chr11	58220007	G	A	nonsynonymous SNV	79	0.974684
chr11	58220098	G	A	nonsynonymous SNV	117	1
chr11	58220125	A	C	nonsynonymous SNV	122	1
chr11	58220412	G	T	nonsynonymous SNV	84	1
chr11	58220563	C	G	nonsynonymous SNV	103	1
chr11	58309033	G	T	nonsynonymous SNV	40	1
chr11	58310018	G	A	nonsynonymous SNV	47	1
chr11	58382775	T	C	nonsynonymous SNV	95	1
chr11	58384649	C	A	nonsynonymous SNV	45	1
chr11	58384663	G	A	nonsynonymous SNV	48	1
chr11	58390245	C	G	nonsynonymous SNV	102	0.205882
chr11	58422201	C	T	nonsynonymous SNV	84	1
chr11	58422234	C	T	nonsynonymous SNV	100	1
chr11	58425799	C	T	nonsynonymous SNV	128	1
chr11	58434541	G	C	nonsynonymous SNV	73	1
chr11	58434832	A	G	nonsynonymous SNV	114	1
chr11	58434860	A	C	nonsynonymous SNV	98	1
chr11	58435411	A	C	nonsynonymous SNV	36	1
chr11	58435483	G	A	nonsynonymous SNV	45	1
chr11	58441009	G	A	nonsynonymous SNV	28	1
chr11	58490297	C	T	nonsynonymous SNV	66	1
chr11	58490488	T	C	nonsynonymous SNV	73	1
chr11	58501648	T	C	nonsynonymous SNV	58	1
chr11	58501708	G	C	nonsynonymous SNV	28	1
chr11	58502101	T	C	nonsynonymous SNV	90	1
chr11	58502110	C	A	nonsynonymous SNV	89	1
chr11	58502184	T	C	nonsynonymous SNV	81	1
chr11	58502185	G	A	nonsynonymous SNV	81	1
chr11	58502214	T	C	nonsynonymous SNV	76	1
chr11	58502236	G	C	nonsynonymous SNV	60	0.9
chr11	58502461	C	G	nonsynonymous SNV	148	0.891892
chr11	58502570	C	T	nonsynonymous SNV	173	0.971098
chr11	58543446	G	T	nonsynonymous SNV	169	1
chr11	58551351	A	G	nonsynonymous SNV	140	0.6
chr11	58551420	A	G	nonsynonymous SNV	186	0.247312
chr11	58551427	T	C	nonsynonymous SNV	189	0.243386
chr11	58551561	T	C	nonsynonymous SNV	139	1
chr11	58551975	C	T	nonsynonymous SNV	182	0.846154
chr11	58552114	C	T	nonsynonymous SNV	237	0.805907
chr11	58566562	G	A	nonsynonymous SNV	161	1
chr11	58566695	A	T	nonsynonymous SNV	182	0.901099
chr11	58567094	C	T	nonsynonymous SNV	138	1
chr11	58580924	C	T	nonsynonymous SNV	93	1
chr11	58580931	T	C	nonsynonymous SNV	86	0.988372
chr11	58581002	G	A	nonsynonymous SNV	41	1
chr11	58581296	T	G	nonsynonymous SNV	129	0.992248
chr11	58581657	G	C	nonsynonymous SNV	175	1
chr11	58597518	A	C	nonsynonymous SNV	60	1
chr11	58597530	A	G	nonsynonymous SNV	65	1
chr11	58597665	A	G	nonsynonymous SNV	72	0.986111
chr11	58597950	A	G	nonsynonymous SNV	53	1
chr11	58598330	A	C	nonsynonymous SNV	40	0.6
chr11	58612561	A	G	nonsynonymous SNV	77	1
chr11	58612571	T	G	nonsynonymous SNV	81	1
chr11	58625762	G	A	nonsynonymous SNV	22	1
chr11	58625793	T	G	nonsynonymous SNV	21	1
chr11	58625906	A	C	nonsynonymous SNV	40	1
chr11	58651660	A	G	nonsynonymous SNV	34	1
chr11	58666516	T	G	nonsynonymous SNV	129	1
chr11	58683932	G	T	nonsynonymous SNV	128	1
chr11	58683989	T	C	nonsynonymous SNV	96	1
chr11	58684031	T	C	nonsynonymous SNV	43	1
chr11	58684032	G	A	nonsynonymous SNV	43	1
chr11	58684115	G	A	nonsynonymous SNV	53	1
chr11	58684257	G	A	nonsynonymous SNV	86	1
chr11	58684463	C	T	nonsynonymous SNV	53	0.773585
chr11	58684715	G	A	nonsynonymous SNV	103	0.941748
chr11	58684722	T	C	nonsynonymous SNV	103	1
chr11	58701958	A	C	nonsynonymous SNV	155	1
chr11	58702327	C	T	nonsynonymous SNV	144	1
chr11	58702396	C	A	nonsynonymous SNV	134	1
chr11	58720212	A	G	nonsynonymous SNV	117	0.641026
chr11	58720458	G	A	nonsynonymous SNV	153	0.248366
chr11	58732374	T	G	nonsynonymous SNV	61	1
chr11	58732469	G	A	nonsynonymous SNV	64	1
chr11	58732649	T	C	nonsynonymous SNV	53	1
chr11	58757873	G	C	nonsynonymous SNV	237	0.223629
chr11	58757967	G	A	nonsynonymous SNV	180	0.85
chr11	58758069	C	T	nonsynonymous SNV	144	1
chr11	58758105	A	G	nonsynonymous SNV	139	1
chr11	58758327	G	A	nonsynonymous SNV	55	1
chr11	58758342	A	C	nonsynonymous SNV	57	1
chr11	58758360	A	C	nonsynonymous SNV	62	1
chr11	58786947	A	G	nonsynonymous SNV	84	1
chr11	58817061	A	G	nonsynonymous SNV	95	1
chr11	58817296	T	C	nonsynonymous SNV	116	1
chr11	58817394	A	C	nonsynonymous SNV	136	1
chr11	58817417	C	G	nonsynonymous SNV	143	1
chr11	58817682	T	C	nonsynonymous SNV	129	1
chr11	58817818	C	G	nonsynonymous SNV	97	1
chr11	58831563	G	C	nonsynonymous SNV	202	0.227723
chr11	58841119	G	T	nonsynonymous SNV	56	1
chr11	58841206	C	T	nonsynonymous SNV	34	1
chr11	58841743	G	A	nonsynonymous SNV	130	1
chr11	58841789	A	G	nonsynonymous SNV	125	1
chr11	58880535	C	T	nonsynonymous SNV	85	1
chr11	58890771	G	T	nonsynonymous SNV	35	1
chr11	58890779	A	G	nonsynonymous SNV	34	1
chr11	58890876	A	C	nonsynonymous SNV	76	1
chr11	58890886	A	C	nonsynonymous SNV	76	1
chr11	58890898	A	G	nonsynonymous SNV	81	1
chr11	58890925	T	A	nonsynonymous SNV	88	1
chr11	58891141	T	A	nonsynonymous SNV	92	1
chr11	58891297	A	G	nonsynonymous SNV	63	1
chr11	58891316	T	C	nonsynonymous SNV	63	1
chr11	58900581	G	T	nonsynonymous SNV	113	0.99115
chr11	58900583	T	G	nonsynonymous SNV	113	0.99115
chr11	58919312	T	C	nonsynonymous SNV	34	1
chr11	58926824	C	T	nonsynonymous SNV	44	1
chr11	58965505	G	A	nonsynonymous SNV	32	1
chr11	58970446	A	G	nonsynonymous SNV	65	1
chr11	59013188	G	C	nonsynonymous SNV	67	1
chr11	59030131	G	C	nonsynonymous SNV	32	0.625
chr11	59031108	C	T	nonsynonymous SNV	21	1
chr11	59039150	G	C	nonsynonymous SNV	34	1
chr11	59039164	T	A	nonsynonymous SNV	32	1
chr11	59040278	C	G	nonsynonymous SNV	26	0.692308
chr11	59041775	T	C	nonsynonymous SNV	23	1
chr11	59042950	T	C	nonsynonymous SNV	50	1
chr11	59043027	G	A	nonsynonymous SNV	62	1
chr11	59043052	G	A	nonsynonymous SNV	59	1
chr11	59049788	C	A	nonsynonymous SNV	23	1
chr11	59051557	G	A	nonsynonymous SNV	37	1
chr11	59052613	T	C	nonsynonymous SNV	23	1
chr11	59053768	C	T	nonsynonymous SNV	97	1
chr11	59053825	T	C	nonsynonymous SNV	74	1
chr11	59054218	T	C	nonsynonymous SNV	155	1
chr11	59054261	G	T	nonsynonymous SNV	132	1
chr11	59054263	T	G	nonsynonymous SNV	134	1
chr11	59054264	T	C	nonsynonymous SNV	134	1
chr11	59054268	C	A	nonsynonymous SNV	137	1
chr11	59054350	C	T	nonsynonymous SNV	140	1
chr11	59054834	T	C	nonsynonymous SNV	119	0.957983
chr11	59054901	G	T	nonsynonymous SNV	108	0.898148
chr11	59054902	T	C	nonsynonymous SNV	109	0.944954
chr11	59054921	T	C	nonsynonymous SNV	81	1
chr11	59055457	C	T	nonsynonymous SNV	148	0.945946
chr11	59055476	C	G	nonsynonymous SNV	111	0.981982
chr11	59055478	G	T	nonsynonymous SNV	124	0.879032
chr11	59055479	C	T	nonsynonymous SNV	124	0.879032
chr11	59055505	T	C	nonsynonymous SNV	153	0.986928
chr11	59055514	C	T	nonsynonymous SNV	160	0.79375
chr11	59056110	G	T	nonsynonymous SNV	132	1
chr11	59060997	C	A	nonsynonymous SNV	172	0.313953
chr11	59061562	C	T	nonsynonymous SNV	95	1
chr11	59061582	C	T	nonsynonymous SNV	72	0.986111
chr11	59061601	C	T	nonsynonymous SNV	52	1
chr11	59062127	A	T	nonsynonymous SNV	149	0.758389
chr11	59062130	C	A	nonsynonymous SNV	136	0.816176
chr11	59062133	G	C	nonsynonymous SNV	148	1
chr11	59062184	C	A	nonsynonymous SNV	150	0.46
chr11	59062189	T	C	nonsynonymous SNV	144	0.493056
chr11	59062208	T	C	nonsynonymous SNV	134	0.343284
chr11	59063474	T	C	nonsynonymous SNV	138	1
chr11	59063576	T	C	nonsynonymous SNV	124	1
chr11	59067147	G	A	nonsynonymous SNV	126	1
chr11	59067829	C	T	nonsynonymous SNV	73	1
chr11	59076508	C	T	nonsynonymous SNV	34	1
chr11	59079896	C	G	nonsynonymous SNV	51	1
chr11	59081872	C	A	nonsynonymous SNV	27	1
chr11	59086679	C	T	nonsynonymous SNV	137	0.992701
chr11	59086701	T	C	nonsynonymous SNV	136	1
chr11	59086739	A	G	nonsynonymous SNV	134	0.992537
chr11	59086904	T	C	nonsynonymous SNV	84	0.988095
chr11	59086929	C	T	nonsynonymous SNV	87	0.988506
chr11	59093316	A	G	nonsynonymous SNV	174	1
chr11	59093413	C	T	nonsynonymous SNV	209	0.497608
chr11	59093508	G	T	nonsynonymous SNV	154	0.746753
chr11	59093509	C	T	nonsynonymous SNV	166	0.759036
chr11	59093559	G	A	nonsynonymous SNV	127	1
chr11	59099909	C	T	nonsynonymous SNV	143	0.804196
chr11	59099929	T	C	nonsynonymous SNV	141	0.943262
chr11	59103341	C	G	nonsynonymous SNV	142	0.838028
chr11	59103514	T	C	nonsynonymous SNV	135	0.844444
chr11	59103538	G	A	nonsynonymous SNV	124	1
chr11	59107981	C	T	nonsynonymous SNV	61	1
chr11	59112554	T	C	nonsynonymous SNV	135	1
chr11	59112636	T	C	nonsynonymous SNV	32	1
chr11	59122737	T	C	nonsynonymous SNV	150	0.68
chr11	59122838	A	G	nonsynonymous SNV	141	0.262411
chr11	59128066	C	T	nonsynonymous SNV	116	0.931034
chr11	59128069	C	T	nonsynonymous SNV	119	0.907563
chr11	59128180	T	C	nonsynonymous SNV	117	0.324786
chr11	59128249	C	T	nonsynonymous SNV	110	0.409091
chr11	59128275	G	T	nonsynonymous SNV	100	0.42
chr11	59128276	C	T	nonsynonymous SNV	109	0.46789
chr11	59128302	T	C	nonsynonymous SNV	114	0.342105
chr11	59129687	T	C	nonsynonymous SNV	103	0.213592
chr11	59129756	T	C	nonsynonymous SNV	117	0.213675
chr11	59129782	T	G	nonsynonymous SNV	124	0.346774
chr11	59129783	T	C	nonsynonymous SNV	126	0.34127
chr11	59129809	T	C	nonsynonymous SNV	128	0.554688
chr11	59129837	G	T	nonsynonymous SNV	117	0.769231
chr11	59130623	C	T	nonsynonymous SNV	38	1
chr11	59133111	C	T	nonsynonymous SNV	61	1
chr11	59133240	G	A	nonsynonymous SNV	43	1
chr11	59133246	C	G	nonsynonymous SNV	39	1
chr11	59204589	A	T	nonsynonymous SNV	34	1
chr11	59589868	C	T	nonsynonymous SNV	40	1
chr11	59590039	C	T	nonsynonymous SNV	25	1
chr11	59590084	G	T	nonsynonymous SNV	21	1
chr11	59613178	T	G	nonsynonymous SNV	97	0.659794
chr11	59613209	A	G	nonsynonymous SNV	87	1
chr11	59613627	C	T	nonsynonymous SNV	49	1
chr11	59613723	G	T	nonsynonymous SNV	57	1
chr11	59613756	T	C	nonsynonymous SNV	65	1
chr11	59614040	T	C	nonsynonymous SNV	22	1
chr11	59749606	G	A	nonsynonymous SNV	50	1
chr11	59759843	G	A	nonsynonymous SNV	56	1
chr11	59860792	G	C	nonsynonymous SNV	79	1
chr11	59983504	G	A	nonsynonymous SNV	24	1
chr11	60031784	T	C	nonsynonymous SNV	21	1
chr11	60187563	A	G	nonsynonymous SNV	30	1
chr11	60188620	A	T	nonsynonymous SNV	57	1
chr11	60188659	A	G	nonsynonymous SNV	53	1
chr11	60377867	G	T	nonsynonymous SNV	69	0.710145
chr11	60477716	A	G	nonsynonymous SNV	81	1
chr11	60478315	G	A	nonsynonymous SNV	68	1
chr11	60479620	C	T	nonsynonymous SNV	29	1
chr11	60750584	C	T	nonsynonymous SNV	28	1
chr11	60779106	T	C	nonsynonymous SNV	94	1
chr11	60779873	C	A	nonsynonymous SNV	59	1
chr11	60950036	A	T	nonsynonymous SNV	35	0.657143
chr11	61069782	C	G	nonsynonymous SNV	78	0.384615
chr11	61070035	C	G	nonsynonymous SNV	79	0.291139
chr11	61359352	C	T	nonsynonymous SNV	51	1
chr11	61450949	A	G	nonsynonymous SNV	118	1
chr11	61509097	T	C	nonsynonymous SNV	78	1
chr11	61671748	G	C	nonsynonymous SNV	29	0.62069
chr11	61915270	T	A	nonsynonymous SNV	32	1
chr11	6223114	G	A	nonsynonymous SNV	21	0.47619
chr11	6228553	C	G	nonsynonymous SNV	28	0.392857
chr11	62330891	G	C	nonsynonymous SNV	54	0.648148
chr11	62552174	G	C	nonsynonymous SNV	121	0.22314
chr11	62584655	C	G	nonsynonymous SNV	74	0.77027
chr11	62715349	C	G	nonsynonymous SNV	63	1
chr11	62728582	T	C	nonsynonymous SNV	65	1
chr11	62837292	C	T	nonsynonymous SNV	92	1
chr11	62850574	C	T	nonsynonymous SNV	91	1
chr11	62881943	A	C	nonsynonymous SNV	72	1
chr11	63083763	T	G	nonsynonymous SNV	36	0.388889
chr11	63889723	T	C	nonsynonymous SNV	58	1
chr11	6511531	C	T	nonsynonymous SNV	25	0.6
chr11	6515922	G	T	nonsynonymous SNV	59	0.338983
chr11	65184592	A	G	nonsynonymous SNV	60	1
chr11	65187049	C	G	nonsynonymous SNV	33	1
chr11	65187476	C	T	nonsynonymous SNV	36	0.75
chr11	65880190	G	T	nonsynonymous SNV	28	1
chr11	65880262	C	T	nonsynonymous SNV	35	1
chr11	65918824	G	A	nonsynonymous SNV	47	1
chr11	65927625	T	C	nonsynonymous SNV	26	1
chr11	65927921	C	G	nonsynonymous SNV	38	1
chr11	65947704	G	C	nonsynonymous SNV	32	0.3125
chr11	66025199	C	T	nonsynonymous SNV	49	1
chr11	66085174	A	C	nonsynonymous SNV	50	1
chr11	67097951	T	A	nonsynonymous SNV	44	1
chr11	67099767	G	T	nonsynonymous SNV	37	1
chr11	67189476	A	C	nonsynonymous SNV	65	0.230769
chr11	67286491	G	C	nonsynonymous SNV	64	0.6875
chr11	67289653	A	G	nonsynonymous SNV	134	1
chr11	67297775	A	G	nonsynonymous SNV	117	0.299145
chr11	67298372	A	C	nonsynonymous SNV	33	0.848485
chr11	67305907	A	C	nonsynonymous SNV	74	1
chr11	67350317	T	G	nonsynonymous SNV	82	0.280488
chr11	67367629	C	A	nonsynonymous SNV	45	1
chr11	67709628	G	A	nonsynonymous SNV	40	1
chr11	67709644	C	A	nonsynonymous SNV	32	1
chr11	67709646	C	G	nonsynonymous SNV	32	1
chr11	67742218	G	T	nonsynonymous SNV	29	1
chr11	67746717	A	C	nonsynonymous SNV	29	0.206897
chr11	67770836	C	A	nonsynonymous SNV	58	1
chr11	67856506	C	T	nonsynonymous SNV	55	1
chr11	67925181	G	A	nonsynonymous SNV	58	0.37931
chr11	68526366	A	G	nonsynonymous SNV	23	0.217391
chr11	68557771	G	A	nonsynonymous SNV	33	1
chr11	68946428	T	G	nonsynonymous SNV	100	1
chr11	68972982	T	C	nonsynonymous SNV	107	1
chr11	68988033	A	C	nonsynonymous SNV	28	1
chr11	68990553	G	A	nonsynonymous SNV	37	1
chr11	68990574	G	A	nonsynonymous SNV	35	1
chr11	68991052	G	A	nonsynonymous SNV	54	1
chr11	69001164	A	G	nonsynonymous SNV	24	1
chr11	69031178	T	C	nonsynonymous SNV	94	1
chr11	69047870	T	C	nonsynonymous SNV	85	1
chr11	69070957	T	C	nonsynonymous SNV	52	1
chr11	69101230	G	C	nonsynonymous SNV	42	0.642857
chr11	69157383	C	G	nonsynonymous SNV	23	0.652174
chr11	69186027	T	C	nonsynonymous SNV	77	1
chr11	69348445	C	A	nonsynonymous SNV	61	1
chr11	69361451	A	G	nonsynonymous SNV	59	1
chr11	69395202	A	G	nonsynonymous SNV	59	1
chr11	69395272	C	A	nonsynonymous SNV	54	1
chr11	69404747	G	C	nonsynonymous SNV	36	0.388889
chr11	69805101	G	C	nonsynonymous SNV	31	1
chr11	69828394	A	G	nonsynonymous SNV	23	1
chr11	69885476	G	C	nonsynonymous SNV	29	0.655172
chr11	69889486	C	G	nonsynonymous SNV	114	0.342105
chr11	69906398	T	G	nonsynonymous SNV	61	0.606557
chr11	69945867	C	G	nonsynonymous SNV	80	0.2875
chr11	70041431	G	A	nonsynonymous SNV	47	0.340426
chr11	70044315	A	C	nonsynonymous SNV	26	0.692308
chr11	70349612	G	A	nonsynonymous SNV	46	0.304348
chr11	71033236	A	G	nonsynonymous SNV	45	1
chr11	71092243	T	C	nonsynonymous SNV	42	1
chr11	71092397	A	C	nonsynonymous SNV	126	0.420635
chr11	71092515	C	G	nonsynonymous SNV	68	0.5
chr11	71097251	C	T	nonsynonymous SNV	48	1
chr11	71098985	A	C	nonsynonymous SNV	103	0.23301
chr11	71099616	T	C	nonsynonymous SNV	155	0.251613
chr11	71113489	G	A	nonsynonymous SNV	79	0.379747
chr11	71113519	T	C	nonsynonymous SNV	88	0.352273
chr11	71113528	C	T	nonsynonymous SNV	90	0.311111
chr11	71113556	C	A	nonsynonymous SNV	82	0.292683
chr11	71113576	C	T	nonsynonymous SNV	80	0.275
chr11	71122885	C	A	nonsynonymous SNV	143	0.293706
chr11	71122911	C	G	nonsynonymous SNV	149	0.281879
chr11	71123060	C	T	nonsynonymous SNV	178	0.230337
chr11	71123066	T	C	nonsynonymous SNV	180	0.233333
chr11	71123074	G	C	nonsynonymous SNV	181	0.243094
chr11	71123132	G	A	nonsynonymous SNV	179	0.234637
chr11	71124088	T	C	nonsynonymous SNV	133	1
chr11	71165582	T	A	nonsynonymous SNV	141	0.262411
chr11	71165589	A	C	nonsynonymous SNV	141	0.269504
chr11	71165595	C	G	nonsynonymous SNV	142	0.274648
chr11	71165615	A	G	nonsynonymous SNV	141	0.29078
chr11	71165659	A	T	nonsynonymous SNV	121	0.247934
chr11	71165663	G	T	nonsynonymous SNV	121	0.239669
chr11	71168809	G	C	nonsynonymous SNV	122	0.54918
chr11	71168825	G	C	nonsynonymous SNV	114	0.570175
chr11	71168830	A	T	nonsynonymous SNV	113	0.584071
chr11	71168841	T	G	nonsynonymous SNV	108	0.62037
chr11	71168876	T	G	nonsynonymous SNV	82	0.695122
chr11	71169756	A	G	nonsynonymous SNV	22	1
chr11	71169761	A	C	nonsynonymous SNV	22	1
chr11	71181286	A	G	nonsynonymous SNV	23	1
chr11	71181310	C	T	nonsynonymous SNV	26	1
chr11	71181353	T	C	nonsynonymous SNV	23	1
chr11	71181355	A	G	nonsynonymous SNV	23	1
chr11	71181362	C	T	nonsynonymous SNV	23	1
chr11	71181365	T	G	nonsynonymous SNV	23	1
chr11	71181366	G	T	nonsynonymous SNV	23	1
chr11	71181367	T	C	nonsynonymous SNV	23	1
chr11	71181510	C	G	nonsynonymous SNV	32	0.96875
chr11	71181523	G	T	nonsynonymous SNV	40	0.9
chr11	71181553	T	C	nonsynonymous SNV	65	0.892308
chr11	71181560	A	C	nonsynonymous SNV	64	1
chr11	71181572	T	C	nonsynonymous SNV	81	0.888889
chr11	71181671	C	T	nonsynonymous SNV	117	0.880342
chr11	71181708	C	A	nonsynonymous SNV	120	0.925
chr11	71181713	A	C	nonsynonymous SNV	118	1
chr11	71181799	A	G	nonsynonymous SNV	89	1
chr11	71182139	T	A	nonsynonymous SNV	34	1
chr11	71182144	A	T	nonsynonymous SNV	33	1
chr11	71182150	T	C	nonsynonymous SNV	35	1
chr11	71182157	A	T	nonsynonymous SNV	35	1
chr11	71182158	A	C	nonsynonymous SNV	35	1
chr11	71182159	T	C	nonsynonymous SNV	35	1
chr11	71182190	A	G	nonsynonymous SNV	44	1
chr11	71182192	T	A	nonsynonymous SNV	44	1
chr11	71182193	G	T	nonsynonymous SNV	44	1
chr11	71182249	G	A	nonsynonymous SNV	62	1
chr11	71182309	G	C	nonsynonymous SNV	74	1
chr11	71182322	A	G	nonsynonymous SNV	73	1
chr11	71182440	A	T	nonsynonymous SNV	91	1
chr11	71182454	T	C	nonsynonymous SNV	102	1
chr11	71182478	T	G	nonsynonymous SNV	112	0.205357
chr11	71182528	T	C	nonsynonymous SNV	137	0.248175
chr11	71182544	C	G	nonsynonymous SNV	135	1
chr11	71182552	A	T	nonsynonymous SNV	138	1
chr11	71182561	C	T	nonsynonymous SNV	144	0.243056
chr11	71182564	T	C	nonsynonymous SNV	146	0.246575
chr11	71182570	T	A	nonsynonymous SNV	141	0.737589
chr11	71182619	C	T	nonsynonymous SNV	123	0.219512
chr11	71182671	A	C	nonsynonymous SNV	77	0.324675
chr11	71182673	T	C	nonsynonymous SNV	74	0.337838
chr11	71182677	T	C	nonsynonymous SNV	68	1
chr11	71182682	G	A	nonsynonymous SNV	66	0.348485
chr11	71218219	C	T	nonsynonymous SNV	33	1
chr11	71218222	T	C	nonsynonymous SNV	33	1
chr11	71218277	C	T	nonsynonymous SNV	29	1
chr11	71218289	T	C	nonsynonymous SNV	29	1
chr11	71218293	A	C	nonsynonymous SNV	30	1
chr11	71218303	C	A	nonsynonymous SNV	30	1
chr11	71784301	G	A	nonsynonymous SNV	40	1
chr11	72045153	G	A	nonsynonymous SNV	36	1
chr11	72120143	C	T	nonsynonymous SNV	35	1
chr11	72176709	G	A	nonsynonymous SNV	66	1
chr11	72189616	G	T	nonsynonymous SNV	83	1
chr11	72198482	G	A	nonsynonymous SNV	82	1
chr11	72198534	C	A	nonsynonymous SNV	73	1
chr11	72198924	T	G	nonsynonymous SNV	42	1
chr11	72259099	T	C	nonsynonymous SNV	60	1
chr11	73113673	T	A	nonsynonymous SNV	41	0.707317
chr11	73375616	A	C	nonsynonymous SNV	161	0.236025
chr11	73395294	A	G	nonsynonymous SNV	100	0.72
chr11	73787255	T	C	nonsynonymous SNV	177	0.672316
chr11	73799225	A	C	nonsynonymous SNV	111	0.666667
chr11	73906973	A	G	nonsynonymous SNV	89	0.213483
chr11	74155187	C	T	nonsynonymous SNV	121	0.31405
chr11	75497025	C	A	nonsynonymous SNV	39	0.615385
chr11	76021938	C	G	nonsynonymous SNV	36	0.527778
chr11	77117797	C	G	nonsynonymous SNV	46	0.673913
chr11	77408126	G	C	nonsynonymous SNV	41	0.634146
chr11	77454858	G	C	nonsynonymous SNV	109	0.330275
chr11	78034442	T	G	nonsynonymous SNV	43	0.27907
chr11	78153940	C	G	nonsynonymous SNV	92	0.315217
chr11	78490739	C	G	nonsynonymous SNV	66	0.439394
chr11	78937607	T	C	nonsynonymous SNV	35	0.2
chr11	82789569	G	C	nonsynonymous SNV	85	0.4
chr11	82917780	G	T	nonsynonymous SNV	44	0.204545
chr11	87402804	T	A	nonsynonymous SNV	39	0.974359
chr11	89060379	C	T	nonsynonymous SNV	53	0.207547
chr11	9021799	A	G	nonsynonymous SNV	47	0.702128
chr11	9331694	A	G	nonsynonymous SNV	66	0.560606
chr11	94506468	A	T	nonsynonymous SNV	50	0.32
chr11	94970772	G	C	nonsynonymous SNV	41	0.317073
chr11	9577160	G	A	nonsynonymous SNV	58	0.689655
chr11	95970763	C	G	nonsynonymous SNV	57	0.649123
chr11	96043455	A	C	nonsynonymous SNV	64	0.390625
chr11	96099982	G	A	nonsynonymous SNV	149	0.416107
chr11	96099994	T	C	nonsynonymous SNV	144	0.451389
chr11	96100015	C	T	nonsynonymous SNV	139	0.258993
chr11	96100036	T	C	nonsynonymous SNV	121	0.190083
chr11	96100099	C	T	nonsynonymous SNV	70	0.414286
chr11	96300797	G	A	nonsynonymous SNV	81	0.296296
chr11	96320242	C	G	nonsynonymous SNV	52	0.480769
chr11	97058582	T	G	nonsynonymous SNV	25	0.4
chr11	98221025	C	G	nonsynonymous SNV	29	0.310345
chr11	98635903	A	C	nonsynonymous SNV	106	0.632075
chr11	98676233	A	C	nonsynonymous SNV	55	0.654545
chr11	98770642	C	G	nonsynonymous SNV	39	0.358974
chr11	98890715	C	G	nonsynonymous SNV	73	0.575342
chr11	99009249	T	G	nonsynonymous SNV	115	0.356522
chr11	99041757	G	C	nonsynonymous SNV	29	0.62069
chr11	99619988	T	G	nonsynonymous SNV	29	0.655172
chr11	99772845	C	A	nonsynonymous SNV	147	0.680272
chr11	99837969	C	G	nonsynonymous SNV	133	0.661654
chr12	100061277	G	C	nonsynonymous SNV	35	0.371429
chr12	100871341	T	C	nonsynonymous SNV	50	0.54
chr12	101042601	C	G	nonsynonymous SNV	31	0.354839
chr12	101415251	A	G	nonsynonymous SNV	45	0.222222
chr12	101415257	A	G	nonsynonymous SNV	45	0.222222
chr12	101415272	A	G	nonsynonymous SNV	47	0.255319
chr12	101415326	C	T	nonsynonymous SNV	39	0.25641
chr12	101415338	T	A	nonsynonymous SNV	34	0.294118
chr12	101415365	C	T	nonsynonymous SNV	28	0.321429
chr12	101463103	A	C	nonsynonymous SNV	46	0.521739
chr12	101588244	G	A	nonsynonymous SNV	24	0.5
chr12	101706577	C	T	nonsynonymous SNV	35	1
chr12	101845144	G	A	nonsynonymous SNV	52	1
chr12	101886957	T	A	nonsynonymous SNV	28	1
chr12	101899018	A	G	nonsynonymous SNV	33	1
chr12	102222050	A	T	nonsynonymous SNV	46	0.565217
chr12	102254543	C	T	nonsynonymous SNV	59	1
chr12	102472304	G	A	nonsynonymous SNV	60	1
chr12	102472461	G	A	nonsynonymous SNV	41	1
chr12	103417654	C	T	nonsynonymous SNV	56	0.214286
chr12	103672485	T	C	nonsynonymous SNV	21	1
chr12	103675134	C	T	nonsynonymous SNV	49	1
chr12	103675193	C	T	nonsynonymous SNV	54	1
chr12	103675424	A	C	nonsynonymous SNV	26	1
chr12	103689815	T	C	nonsynonymous SNV	23	1
chr12	103693465	T	C	nonsynonymous SNV	69	1
chr12	103730256	C	T	nonsynonymous SNV	54	1
chr12	103730292	T	C	nonsynonymous SNV	64	1
chr12	103730361	G	A	nonsynonymous SNV	67	1
chr12	103730394	A	G	nonsynonymous SNV	75	1
chr12	103730429	C	G	nonsynonymous SNV	75	1
chr12	103730430	A	G	nonsynonymous SNV	75	1
chr12	103732273	A	C	nonsynonymous SNV	45	0.4
chr12	103732427	G	T	nonsynonymous SNV	80	0.35
chr12	103763718	T	G	nonsynonymous SNV	35	1
chr12	103763730	T	A	nonsynonymous SNV	41	1
chr12	103763775	C	G	nonsynonymous SNV	68	1
chr12	103763801	A	G	nonsynonymous SNV	71	1
chr12	103764802	T	A	nonsynonymous SNV	54	0.944444
chr12	103765706	C	T	nonsynonymous SNV	56	1
chr12	103765725	G	T	nonsynonymous SNV	55	1
chr12	103765811	G	A	nonsynonymous SNV	56	1
chr12	103767982	C	T	nonsynonymous SNV	36	1
chr12	103768022	T	C	nonsynonymous SNV	38	1
chr12	103853707	A	C	nonsynonymous SNV	63	1
chr12	103855867	G	C	nonsynonymous SNV	47	1
chr12	103895107	C	G	nonsynonymous SNV	50	1
chr12	103895133	G	A	nonsynonymous SNV	53	0.471698
chr12	103895148	G	A	nonsynonymous SNV	46	0.978261
chr12	103895177	C	G	nonsynonymous SNV	46	1
chr12	103986082	A	G	nonsynonymous SNV	21	1
chr12	104008518	C	G	nonsynonymous SNV	23	1
chr12	104008571	A	G	nonsynonymous SNV	22	1
chr12	104031090	G	C	nonsynonymous SNV	21	1
chr12	104037824	T	C	nonsynonymous SNV	72	1
chr12	104038044	A	T	nonsynonymous SNV	53	1
chr12	104038166	T	C	nonsynonymous SNV	24	1
chr12	104101845	T	C	nonsynonymous SNV	39	1
chr12	104102236	T	G	nonsynonymous SNV	54	1
chr12	104103210	G	A	nonsynonymous SNV	26	1
chr12	104103216	C	T	nonsynonymous SNV	24	1
chr12	104103219	A	G	nonsynonymous SNV	22	1
chr12	104103246	G	A	nonsynonymous SNV	22	1
chr12	104112852	T	C	nonsynonymous SNV	43	1
chr12	104112886	T	G	nonsynonymous SNV	37	1
chr12	104116004	C	T	nonsynonymous SNV	49	1
chr12	104116021	A	G	nonsynonymous SNV	59	1
chr12	104116057	A	G	nonsynonymous SNV	78	1
chr12	104116067	A	C	nonsynonymous SNV	81	1
chr12	104116168	A	G	nonsynonymous SNV	117	1
chr12	104116247	A	G	nonsynonymous SNV	97	1
chr12	104116291	A	C	nonsynonymous SNV	68	1
chr12	104116471	G	A	nonsynonymous SNV	45	1
chr12	104116484	T	G	nonsynonymous SNV	42	1
chr12	104118567	A	G	nonsynonymous SNV	34	1
chr12	104130499	A	G	nonsynonymous SNV	66	1
chr12	104130633	T	C	nonsynonymous SNV	79	1
chr12	104130716	G	C	nonsynonymous SNV	90	1
chr12	104130813	A	G	nonsynonymous SNV	75	1
chr12	104130814	A	G	nonsynonymous SNV	75	1
chr12	104132874	T	A	nonsynonymous SNV	50	1
chr12	104134074	A	T	nonsynonymous SNV	66	0.409091
chr12	104134079	A	G	nonsynonymous SNV	67	0.38806
chr12	104134081	A	T	nonsynonymous SNV	70	0.385714
chr12	104134098	A	T	nonsynonymous SNV	72	0.347222
chr12	104138791	C	T	nonsynonymous SNV	32	1
chr12	104138794	G	T	nonsynonymous SNV	32	1
chr12	104147312	T	G	nonsynonymous SNV	35	1
chr12	104147410	G	A	nonsynonymous SNV	50	1
chr12	104148365	T	A	nonsynonymous SNV	98	1
chr12	104151516	T	C	nonsynonymous SNV	102	1
chr12	104216909	G	T	nonsynonymous SNV	111	0.513514
chr12	104216965	A	G	nonsynonymous SNV	146	0.369863
chr12	104216993	C	T	nonsynonymous SNV	153	0.333333
chr12	104217029	A	G	nonsynonymous SNV	160	0.225
chr12	104217031	G	A	nonsynonymous SNV	162	0.222222
chr12	104217097	G	A	nonsynonymous SNV	151	0.907285
chr12	104217251	G	A	nonsynonymous SNV	121	0.975207
chr12	104219426	A	G	nonsynonymous SNV	69	1
chr12	104220392	T	A	nonsynonymous SNV	72	1
chr12	104238281	G	C	nonsynonymous SNV	85	1
chr12	104238309	C	T	nonsynonymous SNV	71	1
chr12	104241070	C	A	nonsynonymous SNV	44	1
chr12	104241234	A	G	nonsynonymous SNV	58	1
chr12	104241235	T	A	nonsynonymous SNV	59	1
chr12	104265130	C	T	nonsynonymous SNV	106	0.207547
chr12	104265136	T	A	nonsynonymous SNV	109	0.201835
chr12	104265137	G	T	nonsynonymous SNV	110	0.2
chr12	104265214	G	C	nonsynonymous SNV	168	0.714286
chr12	104266471	C	T	nonsynonymous SNV	96	1
chr12	104266565	G	A	nonsynonymous SNV	85	1
chr12	104267717	G	A	nonsynonymous SNV	83	1
chr12	104267793	T	C	nonsynonymous SNV	54	1
chr12	104268471	A	G	nonsynonymous SNV	29	1
chr12	104268560	G	C	nonsynonymous SNV	55	1
chr12	104268575	A	G	nonsynonymous SNV	60	1
chr12	104314618	G	C	nonsynonymous SNV	63	1
chr12	104314621	G	T	nonsynonymous SNV	64	1
chr12	104318511	A	G	nonsynonymous SNV	31	1
chr12	104340713	A	C	nonsynonymous SNV	103	0.990291
chr12	104340719	A	C	nonsynonymous SNV	101	1
chr12	104341087	A	G	nonsynonymous SNV	67	1
chr12	104341110	T	G	nonsynonymous SNV	53	0.981132
chr12	104341111	G	A	nonsynonymous SNV	54	1
chr12	104343046	G	A	nonsynonymous SNV	57	1
chr12	104343208	T	C	nonsynonymous SNV	45	1
chr12	104344170	G	A	nonsynonymous SNV	65	1
chr12	104344257	G	A	nonsynonymous SNV	71	1
chr12	104345320	G	A	nonsynonymous SNV	59	1
chr12	104345335	T	C	nonsynonymous SNV	56	1
chr12	104345336	G	A	nonsynonymous SNV	55	1
chr12	104345356	A	T	nonsynonymous SNV	63	1
chr12	104389256	A	G	nonsynonymous SNV	101	1
chr12	104389259	A	C	nonsynonymous SNV	99	1
chr12	104389263	C	T	nonsynonymous SNV	103	1
chr12	104389538	A	G	nonsynonymous SNV	37	1
chr12	104389583	C	A	nonsynonymous SNV	30	1
chr12	104389599	C	A	nonsynonymous SNV	32	1
chr12	104389603	G	C	nonsynonymous SNV	32	1
chr12	104389649	A	G	nonsynonymous SNV	36	1
chr12	104408707	G	A	nonsynonymous SNV	77	1
chr12	104408729	G	C	nonsynonymous SNV	95	1
chr12	104408876	A	C	nonsynonymous SNV	144	1
chr12	104408920	G	C	nonsynonymous SNV	130	1
chr12	104408923	A	G	nonsynonymous SNV	129	1
chr12	104409137	G	A	nonsynonymous SNV	70	1
chr12	104409139	G	A	nonsynonymous SNV	71	1
chr12	104411262	T	C	nonsynonymous SNV	83	1
chr12	104411306	A	C	nonsynonymous SNV	74	1
chr12	104411331	A	G	nonsynonymous SNV	71	1
chr12	104714883	T	G	nonsynonymous SNV	46	0.673913
chr12	104781222	A	G	nonsynonymous SNV	34	1
chr12	104781294	T	C	nonsynonymous SNV	49	1
chr12	105617123	G	A	nonsynonymous SNV	29	0.275862
chr12	105658852	A	G	nonsynonymous SNV	42	1
chr12	110630548	A	C	nonsynonymous SNV	43	0.465116
chr12	11242106	G	C	nonsynonymous SNV	48	0.479167
chr12	112647827	C	G	nonsynonymous SNV	31	0.387097
chr12	112679588	C	A	nonsynonymous SNV	29	0.413793
chr12	112908945	C	A	nonsynonymous SNV	26	0.346154
chr12	112911731	C	T	nonsynonymous SNV	23	0.391304
chr12	113157597	C	T	nonsynonymous SNV	25	1
chr12	113157614	G	A	nonsynonymous SNV	24	1
chr12	113158103	A	G	nonsynonymous SNV	25	1
chr12	113491097	T	G	nonsynonymous SNV	99	1
chr12	113491365	T	G	nonsynonymous SNV	103	1
chr12	113544388	T	C	nonsynonymous SNV	85	1
chr12	113545204	A	G	nonsynonymous SNV	85	1
chr12	113545254	T	A	nonsynonymous SNV	83	1
chr12	113545765	T	A	nonsynonymous SNV	90	1
chr12	113546269	A	G	nonsynonymous SNV	38	1
chr12	116054923	A	G	nonsynonymous SNV	58	1
chr12	116059105	A	G	nonsynonymous SNV	37	1
chr12	116059462	A	G	nonsynonymous SNV	35	1
chr12	116094809	T	G	nonsynonymous SNV	48	0.541667
chr12	116144185	G	C	nonsynonymous SNV	39	1
chr12	116218785	T	G	nonsynonymous SNV	27	1
chr12	116348256	G	A	nonsynonymous SNV	47	1
chr12	116365738	G	C	nonsynonymous SNV	50	1
chr12	116365741	A	G	nonsynonymous SNV	51	1
chr12	116370022	T	C	nonsynonymous SNV	61	1
chr12	116430160	T	C	nonsynonymous SNV	64	1
chr12	116450383	G	T	nonsynonymous SNV	64	1
chr12	116452302	A	G	nonsynonymous SNV	33	1
chr12	116824403	G	A	nonsynonymous SNV	41	1
chr12	116824415	G	C	nonsynonymous SNV	38	1
chr12	116859098	G	T	nonsynonymous SNV	24	1
chr12	117872133	A	G	nonsynonymous SNV	26	1
chr12	117954720	C	T	nonsynonymous SNV	42	1
chr12	118018752	T	C	nonsynonymous SNV	45	1
chr12	118125765	G	C	nonsynonymous SNV	29	0.413793
chr12	118179607	A	G	nonsynonymous SNV	79	1
chr12	118190825	T	C	nonsynonymous SNV	38	1
chr12	118198712	G	A	nonsynonymous SNV	29	1
chr12	119166817	G	A	nonsynonymous SNV	25	1
chr12	119192297	C	T	nonsynonymous SNV	31	1
chr12	119443456	G	A	nonsynonymous SNV	24	1
chr12	119443516	A	C	nonsynonymous SNV	21	0.380952
chr12	119446823	C	A	nonsynonymous SNV	39	1
chr12	13242333	G	C	nonsynonymous SNV	56	0.464286
chr12	17175840	A	C	nonsynonymous SNV	47	0.404255
chr12	21274771	C	T	nonsynonymous SNV	31	0.451613
chr12	26456211	G	C	nonsynonymous SNV	25	1
chr12	26456249	G	C	nonsynonymous SNV	26	1
chr12	26456256	G	A	nonsynonymous SNV	25	1
chr12	28559965	T	C	nonsynonymous SNV	59	1
chr12	28573263	T	C	nonsynonymous SNV	48	1
chr12	28655596	G	A	nonsynonymous SNV	46	1
chr12	28746810	G	A	nonsynonymous SNV	32	1
chr12	28828843	C	T	nonsynonymous SNV	34	1
chr12	29851664	G	A	nonsynonymous SNV	30	1
chr12	29999912	A	C	nonsynonymous SNV	23	0.26087
chr12	30084639	C	G	nonsynonymous SNV	32	1
chr12	30236600	C	A	nonsynonymous SNV	21	1
chr12	30312566	G	C	nonsynonymous SNV	31	1
chr12	31528843	T	C	nonsynonymous SNV	27	0.518519
chr12	33401198	A	G	nonsynonymous SNV	67	0.492537
chr12	3401760	C	G	nonsynonymous SNV	37	0.405405
chr12	34373977	T	G	nonsynonymous SNV	59	0.542373
chr12	3501831	C	T	nonsynonymous SNV	27	1
chr12	3591957	A	C	nonsynonymous SNV	63	0.47619
chr12	3960317	A	C	nonsynonymous SNV	25	0.4
chr12	4203563	A	G	nonsynonymous SNV	51	1
chr12	4880752	A	C	nonsynonymous SNV	36	0.583333
chr12	53139523	C	A	nonsynonymous SNV	47	0.617021
chr12	70268127	A	C	nonsynonymous SNV	43	0.534884
chr12	70959958	C	G	nonsynonymous SNV	56	0.482143
chr12	71318068	C	T	nonsynonymous SNV	21	1
chr12	71946564	G	A	nonsynonymous SNV	63	1
chr12	72175132	T	C	nonsynonymous SNV	27	0.592593
chr12	75925307	A	C	nonsynonymous SNV	30	1
chr12	75982023	G	C	nonsynonymous SNV	43	0.488372
chr12	76329177	G	C	nonsynonymous SNV	105	0.485714
chr12	78797264	C	G	nonsynonymous SNV	52	1
chr12	79050357	G	A	nonsynonymous SNV	23	1
chr12	79055004	A	C	nonsynonymous SNV	28	0.535714
chr12	79076511	A	G	nonsynonymous SNV	27	1
chr12	79147641	G	A	nonsynonymous SNV	44	1
chr12	79164968	T	C	nonsynonymous SNV	30	1
chr12	79266504	T	G	nonsynonymous SNV	29	0.551724
chr12	80721287	T	A	nonsynonymous SNV	21	0.428571
chr12	80874410	A	C	nonsynonymous SNV	38	0.605263
chr12	81168272	A	G	nonsynonymous SNV	63	1
chr12	83712508	G	C	nonsynonymous SNV	30	0.566667
chr12	85343457	A	C	nonsynonymous SNV	41	0.439024
chr12	86688214	T	C	nonsynonymous SNV	35	0.428571
chr12	86882855	G	C	nonsynonymous SNV	22	0.818182
chr12	8705949	A	C	nonsynonymous SNV	45	0.577778
chr12	87341749	C	G	nonsynonymous SNV	38	0.552632
chr12	88795422	C	A	nonsynonymous SNV	47	0.361702
chr12	89510666	G	A	nonsynonymous SNV	48	1
chr12	91519326	T	C	nonsynonymous SNV	39	1
chr12	91537284	A	T	nonsynonymous SNV	30	1
chr12	91537435	G	C	nonsynonymous SNV	36	1
chr12	91538373	A	G	nonsynonymous SNV	84	0.440476
chr12	91648014	T	C	nonsynonymous SNV	39	1
chr12	98216264	A	C	nonsynonymous SNV	50	0.4
chr12	98234285	T	C	nonsynonymous SNV	57	1
chr12	98937129	C	T	nonsynonymous SNV	65	1
chr12	98974693	C	G	nonsynonymous SNV	46	1
chr12	99719051	C	T	nonsynonymous SNV	66	1
chr13	100161909	A	T	nonsynonymous SNV	191	1
chr13	100214762	T	C	nonsynonymous SNV	93	0.322581
chr13	100245878	T	G	nonsynonymous SNV	212	0.316038
chr13	102735653	C	G	nonsynonymous SNV	26	0.230769
chr13	102736567	C	A	nonsynonymous SNV	31	0.225806
chr13	112547361	T	A	nonsynonymous SNV	64	0.609375
chr13	11577894	T	C	nonsynonymous SNV	85	0.588235
chr13	11591333	C	A	nonsynonymous SNV	75	1
chr13	11595940	T	C	nonsynonymous SNV	83	0.228916
chr13	116894976	A	T	nonsynonymous SNV	41	0.292683
chr13	11735499	C	T	nonsynonymous SNV	34	1
chr13	11749476	T	C	nonsynonymous SNV	80	1
chr13	11750854	T	C	nonsynonymous SNV	77	1
chr13	119477824	G	C	nonsynonymous SNV	22	0.272727
chr13	12197946	A	G	nonsynonymous SNV	65	1
chr13	12235534	T	C	nonsynonymous SNV	54	1
chr13	12253784	T	C	nonsynonymous SNV	44	1
chr13	12410398	T	A	nonsynonymous SNV	40	1
chr13	12413268	G	A	nonsynonymous SNV	37	1
chr13	12417563	C	T	nonsynonymous SNV	31	1
chr13	12434188	A	G	nonsynonymous SNV	78	1
chr13	13359334	G	A	nonsynonymous SNV	138	0.768116
chr13	13393334	G	A	nonsynonymous SNV	30	0.5
chr13	13468499	C	G	nonsynonymous SNV	55	1
chr13	13634128	G	A	nonsynonymous SNV	94	1
chr13	13634921	C	T	nonsynonymous SNV	75	1
chr13	13635541	T	G	nonsynonymous SNV	70	1
chr13	13635543	T	G	nonsynonymous SNV	69	1
chr13	13635635	C	A	nonsynonymous SNV	68	1
chr13	13637501	G	A	nonsynonymous SNV	51	1
chr13	13637538	A	G	nonsynonymous SNV	58	1
chr13	13638086	T	C	nonsynonymous SNV	87	1
chr13	13638218	G	T	nonsynonymous SNV	51	1
chr13	13638245	C	G	nonsynonymous SNV	53	1
chr13	13677763	C	G	nonsynonymous SNV	47	1
chr13	13684048	A	G	nonsynonymous SNV	46	1
chr13	13684081	C	A	nonsynonymous SNV	40	1
chr13	13687756	G	A	nonsynonymous SNV	36	1
chr13	13712856	A	C	nonsynonymous SNV	47	1
chr13	13725862	C	A	nonsynonymous SNV	76	1
chr13	13726045	C	T	nonsynonymous SNV	28	1
chr13	13825364	A	G	nonsynonymous SNV	55	1
chr13	14001120	T	G	nonsynonymous SNV	49	1
chr13	14014773	T	C	nonsynonymous SNV	53	1
chr13	14029354	C	T	nonsynonymous SNV	74	1
chr13	14053729	G	T	nonsynonymous SNV	63	1
chr13	14164281	G	A	nonsynonymous SNV	35	1
chr13	14164887	A	G	nonsynonymous SNV	33	1
chr13	14193422	A	G	nonsynonymous SNV	29	1
chr13	14193427	C	G	nonsynonymous SNV	29	1
chr13	14193438	C	T	nonsynonymous SNV	27	1
chr13	14193446	A	G	nonsynonymous SNV	27	1
chr13	14193459	A	G	nonsynonymous SNV	24	1
chr13	14193479	G	A	nonsynonymous SNV	22	1
chr13	14193480	T	C	nonsynonymous SNV	22	1
chr13	14193497	G	T	nonsynonymous SNV	26	1
chr13	14193504	G	A	nonsynonymous SNV	22	1
chr13	14317282	C	T	nonsynonymous SNV	71	1
chr13	14317289	T	C	nonsynonymous SNV	73	1
chr13	15725299	C	A	nonsynonymous SNV	64	1
chr13	15725858	A	G	nonsynonymous SNV	47	1
chr13	15726005	A	G	nonsynonymous SNV	38	1
chr13	15726110	C	G	nonsynonymous SNV	34	1
chr13	16857929	C	T	nonsynonymous SNV	59	1
chr13	16857935	T	C	nonsynonymous SNV	59	1
chr13	17672579	C	T	nonsynonymous SNV	64	1
chr13	17718399	C	G	nonsynonymous SNV	71	1
chr13	17989486	G	A	nonsynonymous SNV	52	1
chr13	17989709	T	C	nonsynonymous SNV	79	1
chr13	19139349	C	A	nonsynonymous SNV	71	1
chr13	19593157	A	T	nonsynonymous SNV	21	1
chr13	19594486	G	T	nonsynonymous SNV	33	1
chr13	19623473	G	A	nonsynonymous SNV	23	1
chr13	19645235	T	G	nonsynonymous SNV	85	1
chr13	19650785	T	C	nonsynonymous SNV	41	1
chr13	19650974	A	G	nonsynonymous SNV	61	1
chr13	19658818	T	C	nonsynonymous SNV	87	1
chr13	19729861	T	G	nonsynonymous SNV	51	1
chr13	20851080	C	T	nonsynonymous SNV	71	1
chr13	20851662	G	A	nonsynonymous SNV	48	1
chr13	20979487	A	G	nonsynonymous SNV	78	1
chr13	21073244	C	T	nonsynonymous SNV	25	1
chr13	21132781	A	G	nonsynonymous SNV	76	1
chr13	21132788	C	A	nonsynonymous SNV	75	1
chr13	21142121	C	G	nonsynonymous SNV	26	1
chr13	21142397	A	G	nonsynonymous SNV	51	1
chr13	21143046	T	G	nonsynonymous SNV	24	1
chr13	21287455	T	C	nonsynonymous SNV	71	1
chr13	21292627	G	A	nonsynonymous SNV	46	1
chr13	21292651	C	G	nonsynonymous SNV	40	1
chr13	21312330	C	A	nonsynonymous SNV	61	1
chr13	21363653	A	G	nonsynonymous SNV	54	1
chr13	21366669	A	G	nonsynonymous SNV	33	1
chr13	21368659	G	A	nonsynonymous SNV	37	1
chr13	21368735	G	A	nonsynonymous SNV	37	1
chr13	21368776	G	A	nonsynonymous SNV	27	1
chr13	21369442	G	A	nonsynonymous SNV	38	1
chr13	21387930	T	G	nonsynonymous SNV	51	0.352941
chr13	21394842	T	C	nonsynonymous SNV	47	1
chr13	21396423	C	A	nonsynonymous SNV	64	1
chr13	21423016	C	T	nonsynonymous SNV	73	1
chr13	21423103	A	G	nonsynonymous SNV	70	1
chr13	21423404	G	T	nonsynonymous SNV	79	1
chr13	21423463	T	C	nonsynonymous SNV	72	1
chr13	21423484	A	G	nonsynonymous SNV	69	1
chr13	21423575	C	T	nonsynonymous SNV	40	1
chr13	21447842	C	T	nonsynonymous SNV	37	1
chr13	21447855	C	T	nonsynonymous SNV	38	1
chr13	21468131	G	C	nonsynonymous SNV	62	1
chr13	21479186	G	T	nonsynonymous SNV	31	1
chr13	21483999	C	A	nonsynonymous SNV	28	1
chr13	21484017	A	G	nonsynonymous SNV	26	1
chr13	21520879	C	A	nonsynonymous SNV	53	1
chr13	21525204	C	T	nonsynonymous SNV	56	1
chr13	21526622	C	T	nonsynonymous SNV	81	1
chr13	21537799	G	A	nonsynonymous SNV	43	1
chr13	21537934	G	C	nonsynonymous SNV	29	1
chr13	21611427	G	T	nonsynonymous SNV	48	1
chr13	21611469	G	A	nonsynonymous SNV	54	1
chr13	21611811	G	C	nonsynonymous SNV	87	1
chr13	21638744	A	G	nonsynonymous SNV	46	1
chr13	21639005	C	T	nonsynonymous SNV	57	1
chr13	21753460	G	C	nonsynonymous SNV	87	1
chr13	21947023	G	A	nonsynonymous SNV	86	1
chr13	21950320	C	T	nonsynonymous SNV	25	1
chr13	21982232	T	G	nonsynonymous SNV	28	1
chr13	21982397	G	C	nonsynonymous SNV	32	0.34375
chr13	21982599	G	T	nonsynonymous SNV	61	1
chr13	21982830	T	G	nonsynonymous SNV	61	1
chr13	21982864	T	C	nonsynonymous SNV	52	1
chr13	22006941	C	T	nonsynonymous SNV	27	1
chr13	22035503	G	C	nonsynonymous SNV	61	1
chr13	22087882	T	G	nonsynonymous SNV	31	1
chr13	22087972	A	G	nonsynonymous SNV	58	1
chr13	22088040	C	A	nonsynonymous SNV	72	0.986111
chr13	22088122	T	G	nonsynonymous SNV	102	1
chr13	22088124	A	T	nonsynonymous SNV	102	1
chr13	22088220	G	A	nonsynonymous SNV	170	1
chr13	22088414	T	A	nonsynonymous SNV	194	1
chr13	22088421	C	A	nonsynonymous SNV	186	1
chr13	22088510	A	T	nonsynonymous SNV	97	1
chr13	22088535	T	C	nonsynonymous SNV	95	1
chr13	22088545	A	G	nonsynonymous SNV	96	1
chr13	22088634	T	C	nonsynonymous SNV	170	1
chr13	22088680	T	C	nonsynonymous SNV	152	1
chr13	22102278	A	G	nonsynonymous SNV	189	0.973545
chr13	22102293	T	A	nonsynonymous SNV	175	1
chr13	22102368	G	A	nonsynonymous SNV	154	0.662338
chr13	22102372	T	G	nonsynonymous SNV	151	1
chr13	22102559	C	A	nonsynonymous SNV	188	0.553191
chr13	22102610	G	C	nonsynonymous SNV	142	0.239437
chr13	22102632	G	T	nonsynonymous SNV	117	0.769231
chr13	22102633	A	T	nonsynonymous SNV	117	0.777778
chr13	22102654	C	A	nonsynonymous SNV	101	0.841584
chr13	22102661	A	G	nonsynonymous SNV	92	0.858696
chr13	22178894	A	G	nonsynonymous SNV	126	1
chr13	22178950	T	A	nonsynonymous SNV	115	1
chr13	22179041	G	A	nonsynonymous SNV	179	1
chr13	22179092	T	C	nonsynonymous SNV	178	1
chr13	22187344	C	A	nonsynonymous SNV	152	1
chr13	22219265	A	G	nonsynonymous SNV	147	1
chr13	22244504	G	A	nonsynonymous SNV	107	1
chr13	22244539	A	G	nonsynonymous SNV	104	1
chr13	22245023	C	T	nonsynonymous SNV	68	1
chr13	22278588	G	T	nonsynonymous SNV	86	0.988372
chr13	22278825	G	A	nonsynonymous SNV	109	1
chr13	22278861	A	G	nonsynonymous SNV	109	1
chr13	22278911	C	T	nonsynonymous SNV	99	1
chr13	22278912	G	C	nonsynonymous SNV	99	1
chr13	22278992	C	T	nonsynonymous SNV	77	1
chr13	22293617	T	C	nonsynonymous SNV	130	1
chr13	22293883	C	A	nonsynonymous SNV	240	0.808333
chr13	22354478	G	C	nonsynonymous SNV	73	1
chr13	22354703	C	T	nonsynonymous SNV	145	1
chr13	22383445	A	G	nonsynonymous SNV	203	1
chr13	22395105	T	C	nonsynonymous SNV	183	1
chr13	22395514	A	T	nonsynonymous SNV	207	1
chr13	22395602	A	G	nonsynonymous SNV	223	1
chr13	22442161	C	T	nonsynonymous SNV	165	1
chr13	22474642	A	G	nonsynonymous SNV	65	1
chr13	22501750	C	A	nonsynonymous SNV	172	1
chr13	22501829	C	G	nonsynonymous SNV	137	1
chr13	22524496	C	T	nonsynonymous SNV	190	1
chr13	22524906	T	C	nonsynonymous SNV	181	1
chr13	22524918	T	A	nonsynonymous SNV	179	1
chr13	22524972	T	A	nonsynonymous SNV	144	1
chr13	22556228	G	A	nonsynonymous SNV	91	1
chr13	22556624	A	T	nonsynonymous SNV	135	1
chr13	22620303	A	G	nonsynonymous SNV	200	1
chr13	22620324	T	C	nonsynonymous SNV	206	1
[truncated: 6,010 more rows]
